# 1 **Lactoferrin retargets adenoviruses to TLR4 to induce an abortive NLRP3-** 2 **associated pyroptotic response in human dendritic cells**

3 **Short title:** *TLR4-mediated HAdV-lactoferrin uptake in DCs*

4  
5 Coraline Chéneau<sup>1†</sup>, Karsten Eichholz<sup>1†‡</sup>, Tuan Hiep Tran<sup>1†§</sup>, Thi Thu Phuong Tran<sup>1</sup>, Océane  
6 Paris<sup>1</sup>, Corinne Henriquet<sup>2</sup>, Martine Pugniere<sup>2</sup> & Eric J Kremer<sup>1\*</sup>

7 <sup>1</sup>Institut de Génétique Moléculaire de Montpellier, Université de Montpellier, CNRS, Montpellier, France

8 <sup>2</sup>Institut de Recherche en Cancérologie de Montpellier, INSERM, Université Montpellier, Institut Régional  
9 du Cancer, Montpellier, France

10 † **Equal contribution**

11 ‡ **Current address:** Vaccine and Infectious Disease Division, Fred Hutchinson Cancer  
12 Research Center, Seattle, WA, USA;

13 § **Current address:** Faculty of Pharmacy, PHENIKAA University, Yen Nghia, Ha Dong, Hanoi  
14 12116, Vietnam, PHENIKAA Research and Technology Institute (PRATI), A&A Green  
15 Phoenix Group JSC, No.167 Hoang Ngan, Trung Hoa, Cau Giay, Hanoi 11313, Vietnam

16 \***Correspondence:** [eric.kremer@igmm.cnrs.fr](mailto:eric.kremer@igmm.cnrs.fr)

## 17 **Abstract**

18 Despite decades of investigations, we still poorly grasp the immunogenicity of human  
19 adenovirus (HAdV)-based vaccines in humans. In this study, we explored the role of  
20 lactoferrin, which belong to the alarmin subset of antimicrobial peptides that provide  
21 immediate direct and indirect activity against a range of pathogens following a breach in tissue  
22 homeostasis. Lactoferrin is a globular, iron-sequestering, glycoprotein that can increase HAdV  
23 infection and maturation of antigen-presenting cells. However, the mechanism by which  
24 HAdV-lactoferrin complexes induce maturation is unknown. We show that lactoferrin  
25 redirects HAdVs from species B, C, and D to toll-like receptor 4 (TLR4) complexes on human  
26 mononuclear phagocyte. TLR4-mediated internalization induces an abortive NLRP3-  
27 associated pyroptotic response inducing pro-inflammatory cytokine release and disrupting  
28 plasma membrane integrity without cell death. These data impact our understanding of the  
29 immunogenicity of HAdV-based vaccines and may provide ways to increase their efficacy.

## 30 **Introduction**

31 The gaps in our understanding of the immunogenicity versus efficacy of viral vector-based  
32 vaccines are notable. For example, how does the rapid recruitment of immune cells and release  
33 of danger-associated molecular patterns (DAMPs) following vector delivery influence vaccine  
34 efficacy? In this study, we addressed the impact of a host defense peptide/protein (HDP) on  
35 human adenovirus (HAdV)-based vaccines. HDPs, also known as antimicrobial peptides, are  
36 evolutionary conserved effector molecules of the innate immune system. HDPs can act  
37 directly via antibiotic-like properties against a broad array of infectious agents [1,2], or  
38 indirectly by promoting the activation and/or maturation of antigen-presenting cells. Many  
39 HDPs are produced by neutrophils and epithelial cells of skin, oral mucosa, and the  
40 gastrointestinal tract. The cytoplasmic content of neutrophils, which are among the first  
41 leukocytes to infiltrate pathogen-infected and vaccine-injected tissues, is ~20% HDPs [3]. The  
42 rapid delivery of HDPs acts as part of the first line responders to the disruption of tissue  
43 homeostasis [4]. Functionally, HDPs are able to neutralize endotoxin, recruit and modulate the  
44 activities of immune cells, and induce angiogenesis. The alarmins (e.g. lactoferrin,  $\alpha$ -defensin,  
45 and cathelicidin LL-37) are a subset of HDPs that also modulate innate and adaptive immune  
46 responses by directly engaging several pathways including pattern recognition receptor (PRR)  
47 signaling in antigen-presenting cells (APCs) [1,2]. Lactoferrin is an 80 kDa, multifunctional  
48 member of the transferrin family that sequesters iron, is produced largely by neutrophils, and  
49 its physiological concentration can reach mg/ml in some cases. Functionally, lactoferrin can  
50 induce dendritic cell (DC) maturation and, in the context of infections, drive Th1-cell  
51 responses [5–7].

52 In addition to their ability to influence innate and adaptive immune responses to bacteria,  
53 fungi, and enveloped viruses, some alarmins also influence adenovirus (AdV) uptake [8–10].  
54 AdVs are 150 megaDaltons, ~90 nm diameter, nonenveloped proteinaceous particles  
55 containing a linear double-stranded DNA genome of ~36,000 ( $\pm$  9,000) bp. Human AdVs  
56 (HAdVs) are classified into species (A-G) and types (~80) based on serology and phylogeny.  
57 In most cases, HAdVs cause self-limiting respiratory, ocular and gastro-intestinal tract  
58 infections in all populations regardless of health standards. Over the last 40 years the  
59 vectorization and immunogenicity of HAdVs have been of increasing interest in the context of  
60 vaccines, gene transfer, and morbidity associated with HAdV reactivation in immune-  
61 compromised individuals. In epithelial cells, alarmins influence HAdV infections via multiple

62 mechanisms. Lactoferrin acts as a bridging factor during species C HAdV (types 1, 2, 5 and 6)  
63 infection in epithelial-like cells, independent of coxsackievirus adenovirus receptor (CAR), the  
64 primary cell surface attachment molecule for species C HAdVs [11]. Adams et al. reported  
65 that lactoferrin also mediates a modest increase in HAdV type 5 (HAdV-C5) uptake by human  
66 DC [9] and increased maturation. However, a mechanistic understanding of how increased  
67 uptake occurs and how DC maturation is induced, including which PRRs are engaged, are  
68 indispensable.

69 In this study, we characterize the mechanism by which HAdV-lactoferrin complexes induce  
70 human DC infection, inflammatory response, and maturation. We show that lactoferrin  
71 directly binds HAdV-C5, -D26, and -B35 with affinities in the micromolar range and increases  
72 HAdV uptake by mononuclear phagocytes. We demonstrate that lactoferrin re-targets HAdVs  
73 to toll-like receptor 4 (TLR4) complexes on the cell surface. Engagement of TLR4 complexes  
74 increases HAdV uptake, even in the presence of anti-HAdV neutralizing antibodies, and  
75 induces a cathepsin B-associated NLRP3 inflammasome, which includes caspase-1 activity,  
76 and release of interleukin 1 beta (IL-1 $\beta$ ) - but not cell death. This pathway appears to be a  
77 variation of the alternative NLRP3 pathway induced by LPS via TLR4 engagement. In  
78 addition to a better understanding of the immunogenicity of HAdVs and HAdV-based vectors  
79 and vaccines, our data resolve the discordance between the TLR4-associated response to  
80 HAdVs in mice versus that of human phagocytes [12,13].

## 81 **Materials and Methods**

### 82 **Cells and culture conditions**

83 Blood samples were obtained from >100 anonymous donors at the regional blood bank (EFS,  
84 Montpellier, France). An internal review board approved the use of human blood samples.  
85 Monocyte-derived dendritic cells (DCs) were generated from freshly isolated or frozen CD14<sup>+</sup>  
86 monocytes using CD14 MicroBeads human (MiltenyiBiotec) in the presence of 50 ng/ml  
87 granulocyte-macrophage colony-stimulating factor (GM-CSF) and of 20 ng/ml interleukin-4  
88 (IL-4) (PeproTech). DCs stimulation was performed 6 days post-isolation of monocytes.  
89 Monocyte-derived Langerhans cells (LCs) were generated using 200 ng/ml GM-CSF and 10  
90 ng/ml TGF- $\beta$ . 911 cells and 293 E4-pIX cells were grown in Dulbecco's modified Eagle  
91 medium (DMEM) and minimum essential medium (MEM $\alpha$ ) with Earle's salts, L-glutamine  
92 supplemented with 10% fetal bovine serum (FBS).

### 93 **Adenoviruses**

94 The HAdV used in this study are replication-defective (deleted in the E1 region). The HAdV-  
95 C5 vector contained a GFP expression cassette. The HAdV-D26 vector contained a GFP-  
96 luciferase fusion expression cassette [14]. The HAdV-B35 vector contained a YFP expression  
97 cassette [15]. The vectors were propagated in 911 or 293 E4-pIX cells and purified to > 99%  
98 homogeneity by two CsCl density gradients.

### 99 **DC stimulation with HAdV-lactoferrin complexes**

100 DCs ( $4 \times 10^5$  in 400  $\mu$ l of complete medium) were incubated with HAdV-C5, HAdV-D26 or  
101 HAdV-B35 ( $0.1$  to  $2 \times 10^4$  physical particles (pp)/cell). We generated HAdV-lactoferrin  
102 complexes by incubating the virus with 40  $\mu$ g lactoferrin (Sigma-Aldrich) for 30 min at room  
103 temperature. This corresponds to 100  $\mu$ g/ml (1.25  $\mu$ M) lactoferrin in 400  $\mu$ l. These  
104 concentrations are similar to that found in an inflammatory environment of infected tissues.  
105 When specified, cells were complexed with IVIg (human IgG pooled from between 5,000 and  
106 50,000 donors/batch) (Baxter SAS) or with lactoferricin (fragment of 49AA). Cells were  
107 incubated with HAdV-lactoferrin for 4 h, then washed and let incubated again for 24 h. The  
108 TLR4 agonist lipopolysaccharide (LPS) (Sigma-Aldrich) and NLRP3 inflammasome inducer  
109 nigericin (InvivoGen) were used at 100 ng/ml and 10  $\mu$ M, respectively, to induce NLRP3  
110 inflammasome formation. The inhibitors were used at the following concentrations, TLR4  
111 inhibitors TAK-242 (Merck Millipore) at 1  $\mu$ g/ml, oxPAPC (InvivoGen) at 30  $\mu$ g/ml, TRIF  
112 inhibitory peptide (InvivoGen) at 25  $\mu$ M, Syk inhibitor R406 (InvivoGen) at 5  $\mu$ M, KCl  
113 (Sigma-Aldrich) at 45 mM, ROS inhibitor N-acetyl-L-cysteine (Sigma-Aldrich) at 2 mM,  
114 cathepsin B inhibitor MDL 28170 (Tocris Bioscience) at 0.1  $\mu$ M, NLRP3 inhibitor MCC-  
115 950/CP-456773 (Sigma-Aldrich) at 10  $\mu$ M, Bay11-7082 (Sigma-Aldrich) at 10  $\mu$ M, caspase-1  
116 inhibitor WEHD (Santa Cruz) and YVAD (InvivoGen) at 20  $\mu$ M, VX765 (InvivoGen) at 10  
117  $\mu$ M, caspase-8 inhibitor Z-IEDT at 20  $\mu$ M, RIPK1 inhibitor GSK963 (Sigma-Aldrich) at 3  
118  $\mu$ M, RIPK3 inhibitors GSK872 (Merck Millipore) at 3  $\mu$ M and necrosulfonamide (R&D  
119 systems) at 1  $\mu$ M. TLR4/MD-2, TLR4 (R&D Systems), MD-2 (PeproTech) recombinant  
120 protein and CD14 antibody (Beckman) were used at 20  $\mu$ g/ml. Inhibitors were added on cells  
121 and recombinant proteins or antibody were added on HAdV-lactoferrin complex 1 h before  
122 stimulation. TLR4 surface expression level was assess with an anti-TLR4 antibody (Miltenyi  
123 Biotech) after 4 or 24 h.

### 124 **SPR analyses**

125 Surface plasmon resonance (SPR) analyses were carried out on a BIAcore 3000 apparatus in  
126 HBS-EP buffer (10 mM HEPES, 150 mM NaCl, 3 mM EDTA, and 0.005% (v/v) polysorbate  
127 20, pH 7.4). HAdV-C5, HAdV-D26 and HAdV-B35 diluted in acetate buffer at pH 4 were  
128 immobilized on three different flow cells of a CM5 sensor chip by amine coupling according  
129 to the manufacturer instructions. Immobilization levels were between 3,500 and 4,000 RU.  
130 Flow cell 1, without immobilized HAdV, was used as a control. Lactoferrin was injected at  
131 100 nM on the four flow cells simultaneously. For  $K_D$  determination different concentrations  
132 of lactoferrin (6.25 - 200 nM) were injected at 30  $\mu$ l/min during 180 s of association and 600 s  
133 of dissociation with running buffer. Regeneration was performed with pulses of gly-HCl pH  
134 1.7. The kinetic constants were evaluated from the sensorgrams after double-blank subtraction  
135 with BIAevaluation software 3.2 (GE Healthcare) using a bivalent fitting model for  
136 lactoferrin. All experiments were repeated at least twice for each virus on a freshly coated  
137 flow cell.

### 138 **Flow cytometry**

139 Cellular GFP or YFP expression from the HAdV-C5, -B35, -D26 vectors was assayed by flow  
140 cytometry. Fluorescence intensity was assessed after complex treatment for 24 h. Cell  
141 membrane integrity was assessed by collecting cells by centrifugation 800 x g, the cell pellets  
142 were re-suspended in PBS, 10% FBS, 7-aminoactinomycin D (7-AAD) (Becton-Dickinson  
143 Pharmigen) and analyzed on a FACS Canto II (Becton-Dickinson Pharmigen) or NovoCyte  
144 (ACEA Biosciences) flow cytometer.

145 Inflammasome formation was monitored as previously described [16] with minor  
146 modifications. DCs ( $1.5 \times 10^5$  in 150  $\mu$ l of complete medium) were seeded in a conical bottom  
147 96 well plate and incubated with HDP-HAdV complexes containing 20,000 HAdV pp/cell.  
148 LPS/nigericin and immune complexed HAdV-C5 (IC-HAdV) were used as positive controls  
149 to identify inflammasome positive cells. IC-HAdV-C5 were prepared with IVIg (human IgG  
150 pooled from between 1,000 and 50,000 donors/batch) (Baxter SAS) as previously described  
151 [17]. Cells were fixed by adding 50  $\mu$ l 4% PFA, PBS for 10 min on ice and centrifuged at 650  
152 x g for 5 min. Supernatants were discarded and cells were permeabilized with 150  $\mu$ l PBS/3%  
153 FCS/0.1% saponin for 20 min and collected by centrifugation. Supernatant was removed, and  
154 cells were re-suspended in 100  $\mu$ l 1:500 rabbit anti-ASC (N-15)-R (Santa Cruz, sc-22514-R)  
155 PBS/3%FCS/0.1% saponin and incubated overnight at 4°C. Following overnight incubation,  
156 cells were pelleted at 650 x g for 5 min, washed once with 150  $\mu$ l PBS/3% FCS:0.1% saponin,

157 pelleted again and incubated for 45 min in 100  $\mu$ l 1:500 Alexa-488 1:500 donkey anti-rabbit  
158 PBS:3% FCS:0.1% saponin for 45 min at room temperature. Cells were collected again by  
159 centrifugation and re-suspended in 150  $\mu$ l PBS/ 3% FCS/0.1% saponin. The BD FACS-Canto  
160 II was used for acquisition. Samples were gated on DC and any doublets were excluded using  
161 forward light scattering (FSC)-area versus FSC width. Inflammasome positive cells were  
162 identified in the green channel as FL1-width low, and FL1-height high.

### 163 **Cytokines secretion**

164 Supernatants were collected after 4 or 24 h and the levels of TNF and IL-1 $\beta$  were quantified  
165 by ELISA using OptEIA human TNF ELISA Set (BD Biosciences) and human IL-1 $\beta$ /IL-1F2  
166 DuoSet ELISA (R&D systems) following the manufacturer's instructions. In addition, 22  
167 cytokines were detected by Luminex on Bio-plex Magpix using Bio-plex human chemokine,  
168 cytokine kit (Bio-Rad) following the manufacturer's instructions.

### 169 **LDH release**

170 LDH release was quantified using an LDH Cytotoxicity Assay Kit (Thermo scientific)  
171 following the manufacturer's instructions. Briefly, 5 x 10<sup>5</sup> cells were cultures in 96-well  
172 plates, infected for 4 h, and 100  $\mu$ l of supernatant were collected to assess LDH activity. Fresh  
173 reaction mixture (100  $\mu$ l) was then added to each well, incubated at room temperature for 30  
174 min, the reaction was stopped, and the absorbance was determined at 490 nm using a  
175 microplate reader (NanoQuant, Tecan).

### 176 **Quantification of mRNAs**

177 The levels of human *TNF*, *NLRP3*, *CASP1* and *IL1B* mRNAs were analyzed using quantitative  
178 reverse transcription-PCR (qRT-PCR). Total RNAs were isolated from DCs using a High Pure  
179 RNA isolation kit (Roche). Reverse transcription was performed with a Superscript III first-  
180 strand synthesis system (Invitrogen, Life Technologies) using 300 ng of total RNA and  
181 random hexamers. The cDNA samples were diluted 1:10 in water and analyzed in triplicate  
182 using a LightCycler 480 detection system (Roche, Meylan, France). PCR conditions were  
183 95°C for 5 min and 45 cycles of 95°C for 15 s, 65°C or 70°C for 15 s, and 72°C for 15 s,  
184 targeting the *GAPDH* (glyceraldehyde-3-phosphate dehydrogenase) mRNA as an internal  
185 standard. Primer sequences were as follows for *NLRP3* (5'-CCTCTC TGATGAGGCCCAAG-  
186 3' (*NLRP3* forward) and 5'-GCAGCAAAGTGGAAAGGAAG-3' (*NLRP3* reverse)) at 65°C,  
187 *IL1B* (5'-AAACAGATGAAGTGCTCCTTCC-3' (*IL1B* forward) and 5'-

188 AAGATGAAGGGAAAGAAGGTGC-3' (*IL1B* reverse) at 65°C, *GAPDH* (5'-  
189 ACAGTCCATGCCATCACTGCC-3' (*GAPDH* forward) and 5'-  
190 GCCTGCTTCACCACCTTCTTG-3' (*GAPDH* reverse) at 70°C. Relative gene expression  
191 levels of each respective gene were calculated using the threshold cycle ( $2^{-\Delta\Delta CT}$ ) method and  
192 normalized to *GAPDH* [17].

## 193 **Results**

### 194 **Lactoferrin binds to HAdV-C5, -D26 and -B35 and increases infection of DCs**

195 At physiological pH, HAdV-C5, -D26 and -B35 have patches of negative surface charges on  
196 hexon that should potentiate cationic alarmin binding. We therefore quantified the affinity of  
197 human lactoferrin to each virus capsid by surface plasmon resonance (SPR). The HAdVs were  
198 immobilized on a CM5 sensor chip and then escalating doses of lactoferrin were injected over  
199 the sensor surfaces. We found that lactoferrin binds the three HAdVs with affinities ( $K_D$ ) that  
200 varied from 0.8 to 54  $\mu$ M (**Figure 1A & B, and Supplemental Figure 1A**).

201 In human myeloid and epithelial cells, HAdV-C5, HAdV-D26, and HAdV-B35 receptor use  
202 does not overlap [18]: HAdV-C5 predominantly uses CAR as an attachment molecules ,  
203 HAdV-D26 uses sialic acid-bearing glycans as a primary cell entry receptor [19], and HAdV-  
204 B35 predominantly uses CD46 [20]. We therefore tested the impact of lactoferrin on HAdV  
205 infection using replication-defective HAdV vector-mediated transgene expression, which is a  
206 surrogate assay for receptor engagement, internalization, cytoplasmic transport, docking at the  
207 nuclear pore, delivery of the genome to the nucleus, and transcription of the GFP expression  
208 cassette. Consistent with earlier reports [21], we found that lactoferrin increased (~2 to 4 fold)  
209 infection of human DCs by a species C HAdV (type 5), and in addition we show that HAdV-  
210 D26- and HAdV-B35-lactoferrin complexes are more infectious than the HAdV alone (**Figure**  
211 **1C & D**). Preincubating HAdVs with lactoferrin, adding lactoferrin to the cell medium before  
212 HAdV, or adding lactoferrin to the cell medium after HAdV, all increased HAdV infection  
213 efficacy (**Supplemental Figure 1B**). In addition, we found that lactoferrin-enhanced infection  
214 was not unique to DCs: -monocytes and monocyte-derived Langerhans cells were also more  
215 readily infected by HAdV-lactoferrin complexes (except HAdV-B35 on monocytes)  
216 (**Supplemental Figure 1C-D**). Together, these data demonstrate that at physiological  
217 concentrations lactoferrin binds to three HAdV types from different species and increased  
218 uptake by DC.

### 219 **HAdV-lactoferrin complexes induce DC cytokine secretion**

220 By influencing pathogen uptake alarmins could allow a host to better detect and respond to  
221 pathogens. Conversely, pathogen - alarmins interactions could reduce an APC's ability to  
222 present antigens and therefore dampen a downstream response. If the response were pro-host,



223 one would expect DC maturation and an inflammatory response. To determine whether  
224 HAdV-lactoferrin complexes influences DC maturation, we characterized the cytokine and  
225 chemokine profile using a multiplex array. Compared to mock-treated DCs, HAdV-D26 and  
226 HAdV-B35 induced a greater cytokine response than HAdV-C5 (**Figure 2A left column**). By  
227 contrast, compared to lactoferrin-treated DCs, HAdV-lactoferrin complexes induced an  
228 increase in the release of IL-1 $\alpha$  and IL-1 $\beta$  (**Figure 2A center column**). When comparing  
229 HAdVs vs HAdV-lactoferrin complexes, the addition of lactoferrin induced a greater effect on  
230 HAdV-C5, which is likely due in part to the lower effect of HAdV-C5 alone (**Figure 2A right**  
231 **column, see Supplemental Figure 2A for raw data**). We then quantified IL-1 $\beta$  in the  
232 supernatant in time-dependent assays from multiple donors. HAdV-lactoferrin complexes  
233 rapidly induced >100-fold more IL-1 $\beta$  release than HAdVs alone, which further increased  
234 from 4 to 24 h post-stimulation (**Figure 2B**). In addition, monocytes also released more IL-1 $\beta$   
235 when challenged with HAdV-lactoferrin complexes compared to HAdV alone (**Supplemental**  
236 **Figure 2B**).

237 We previously showed that individual serum and pooled IgGs (IVIG) containing anti-HAdV-  
238 C5 neutralizing IgGs induced the maturation of human DCs [17,22]. To benchmark the effects  
239 induced by lactoferrin, we compared HAdVs complexed with IVIG, lactoferrin or  
240 IVIG/lactoferrin. We found that HAdV-lactoferrin complexes led to a greater efficacy of gene  
241 transfer (higher percentage of cells expressing GFP). HAdVs complexed with IVIG/lactoferrin  
242 also led to more GFP/infected cell (more GFP<sup>high</sup> cell) than HAdV-IVIG complexes (**Figure**  
243 **2C and Supplemental Figure 2C**). Moreover, more IL-1 $\beta$  was released when IVIG and  
244 lactoferrin were combined with the HAdVs, consistent with observation that IL-1 $\beta$  release is  
245 directly linked to HAdV infection (**Figure 2D**). In addition, HAdV-lactoferrin complexes  
246 decreased phagocytosis, a hallmark of functional DC maturation (**Supplemental Figure 2D**).  
247 Together, these data demonstrate that lactoferrin-associated HAdV infection is associated with  
248 DC cytokine secretion and functional maturation.

#### 249 **TLR4 is involved HAdV-lactoferrin induced DC maturation**

250 Increased infection could be due to a handful factors, including alternative receptor  
251 engagement and/or more efficient intracellular trafficking. Of note, lactoferrin may increase  
252 DC maturation and IL-1 $\beta$  release by interacting with TLR4 [5,23–25]. In some myeloid cells  
253 TLR4 forms a complex with MD-2 for ligand binding [26] and with CD14 for TLR4

254 internalization [27]. MD-2 acts as a co-receptor for recognition of both exogenous ligands and  
255 endogenous ligands [26,28,29]. In addition, Doronin *et al.* proposed that HAdVs, via a murine  
256 coagulation FX-bridge, interact with murine TLR4 [12]. Yet, human FX did not act as a bridge  
257 for HAdV-C5 via TLR4 on human DCs [13]. We therefore probed the possible interactions  
258 between HAdV-lactoferrin complexes and the TLR4 pathway. To determine whether HAdV-  
259 lactoferrin complexes engage the TLR4 complex on the cell surface, we incubated the  
260 complexes with recombinant TLR4, MD-2, or TLR4/MD-2 dimers, or blocked CD14 on the  
261 cell surface with an anti-CD14 antibody. We found the greatest reduction of infection in the  
262 presence of the TL4/MD-2 dimer (**Figure 3A and Supplemental Figure 3A**). To address the  
263 involvement of the cytoplasmic TLR4 domain, we used TAK-242, a cell-permeable  
264 cyclohexene-carboxylate to disrupt TLR4 interaction with adaptor molecules TIRAP and  
265 TRAM [30–32]. We found that TAK-242 reduced HAdV-lactoferrin-mediated infection, IL-  
266 1 $\beta$  release and TNF secretion in DCs (**Figure 3B-C**). By contrast, interruption of TLR4-  
267 TIRAP/TRAM interactions had no notable impact on the infection of DCs, monocytes, or  
268 Langerhans cells by the HAdVs alone (**Supplemental Figure 3B - D**). We then used oxPAPC  
269 and TRIF inhibitory peptide (Pepinh-TRIF) to inhibit extracellular TLR4 - MD2 interactions  
270 and cytoplasmic TLR4 - TRIF interactions, respectively. oxPAPC and Pepinh-TRIF decreased  
271 infection of HAdV-C5- and HAdV-D26-lactoferrin, while infection by HAdV-B35-lactoferrin  
272 increased (**Figure 3D-E**).

273 We then perturbed TLR4-MyD88-Syk activation of the NF- $\kappa$ B pathway using R406 and  
274 Bay11-7082. R406 decreased HAdV-lactoferrin infections, consistent with its impact on  
275 TLR4-MyD88-Syk associated endocytosis, while Bay11-7082 had no effect on infection,  
276 consistent with its downstream signaling role (**Figure 3E**). Importantly, all of the drugs and  
277 peptides affecting TLR4 interactions reduced IL-1 $\beta$  release (**Figure 3F**). In addition,  
278 lactoferrin, TAK-242, and Pepinh-TRIF did not change TLR4 surface expression, while high  
279 concentration of oxPAPC increased TLR4 levels (**Supplemental Figure 3E-G**).

280 Of note, lactoferrin is also posttranslationally cleaved to generate lactoferricin, a biologically  
281 active N-terminal fragment of 49 aa. Lactoferricin also binds to negatively charged hexon  
282 hypervariable regions (HVRs) of HAdV-C5, -A31 and -B35 [33]. To determine if lactoferricin  
283 could mimic the effects of lactoferrin, we incubated the former with the HAdV vectors. We  
284 found no notable increase in HAdV infections or IL-1 $\beta$  release (**Supplemental Figure 3H &**  
285 **I**, respectively), suggesting that the C-terminal fragment plays a role in HAdV-TLR4

286 interactions. Together, these data demonstrate that interfering with TLR4  
287 engagement/signaling reduces HAdV-lactoferrin-mediated transgene expression and DCs  
288 maturation in the case of HAdV-C5 and -D26.

### 289 **HAdV-lactoferrin complexes induce NLRP3 inflammasome formation**

290 The inflammasome is a multiprotein cytosolic platform consisting of a PRR that induces  
291 nucleation of ASC (apoptosis associated speck-like protein containing a CARD), and  
292 recruitment of pro-caspase 1. Pro-caspase-1 auto-activation can be followed by removal of the  
293 N-terminal of gasdermin D (GSDMD), which initiates the loss of plasma membrane integrity  
294 via pore formation [34]. Classic NLRP3 inflammasome formation (canonical and non-  
295 canonical) is preceded by transcriptional priming event (signal 1) needed to produce  
296 inflammasome components and cytokines [35]. TLR4 engagement by LPS induces an  
297 alternative NLRP3 inflammasome activation, which does not need transcriptional priming, in  
298 human mononuclear phagocytes [36]. To determine whether HAdV-lactoferrin complexes  
299 induced transcription of inflammasome components, we used RT-qPCR to examine the  
300 mRNAs of inflammasome components. We found that in most cases HAdV-lactoferrin  
301 complexes significantly increased *NLRP3*, *CASP1*, *IL1B* and *TNF* mRNAs compared to the  
302 HAdVs (alone) (**Figure 4A**). To directly address inflammasome formation, we used flow  
303 cytometry to detect inflammasome-containing DCs using aggregation of ASC as a readout.  
304 During inflammasome formation, ASC changes from being distributed throughout the  
305 cytoplasm to an aggregate of ~1  $\mu\text{m}$  diameter upon nucleation by a NLRP3. ASC nucleation  
306 can be directly visualized by changes in the fluorescence pulse width/ratio. While this assay  
307 does not allow quantification of all the cells that contain, or will contain an inflammasome, it  
308 does provide a snapshot of inflammasome formation at a given time. We found that <1% of  
309 mock-treated DCs contained an inflammasome. LPS/nigericin and HAdV-C5 complexed with  
310 neutralizing IgGs in IVIG (HAdV-C5-IgG) [17] had ~5 and 4% inflammasome-positive cells,  
311 respectively (~40% of the DCs will undergo pyroptosis in 8 h when incubated with this  
312 concentration of HAdV-C5-IgG [17]). We found an increase in the number of inflammasome-  
313 positive DCs 3 h post-challenge with HAdV-C5-lactoferrin complexes (**Figure 4B**). While the  
314 number of inflammasome containing cells were similar following challenges with HAdV-B35-  
315 lactoferrin complex compare to HAdV-C5- and HAdV-D26-lactoferrin, the difference was  
316 modest compared to HAdV-B35 alone.

317 As IL-1 $\beta$  release is associated with both classic and alternative activation of NLRP3  
318 inflammasomes, we explored the initiation steps. Inducers of NLRP3 inflammasome include  
319 K<sup>+</sup> efflux, Ca<sup>2+</sup> signaling, mitochondrial dysfunction, lysosomal rupture, or PRR engagement  
320 [34]. To identify the HAdV-lactoferrin-associated trigger(s), DCs were treated with KCl (to  
321 prevent K<sup>+</sup> efflux), NAC (reactive oxygen species scavenger), and MDL (cathepsin B  
322 inhibitor). The addition of extracellular K<sup>+</sup>, and NAC did not decrease the release of IL-1 $\beta$   
323 (**Figure 4C**). By contrast, MDL significantly reduced IL-1 $\beta$  release (**Figure 4C**), suggesting  
324 that rupture of lysosome-related organelles was involved. To determine whether the IL-1 $\beta$   
325 release is linked to an NLRP3 inflammasome, DCs were pre-incubated with MCC-950  
326 (NLRP3 inhibitor), which attenuated IL-1 $\beta$  release in response to HAdV-lactoferrin  
327 complexes (**Figure 4D**).

328 We then examined the role of the caspases by incubating cells with Z-WEHD-FMK (caspase-  
329 1, -4, -5 and -8 inhibitor), Z-YVAD-FMK (caspase-1, -4 and -5 inhibitor), VX765 (caspase-1  
330 and -4 inhibitor) or Z-IETD (caspase-8 inhibitor). Globally, all inhibitors that affected  
331 caspase-1 and -8 activity reduced IL-1 $\beta$  release (**Figure 4E-G**). In addition to the direct effects  
332 of TLR4 engagement and signaling, it was possible that TNF secretion induced an autocrine  
333 response and inflammasome activation via the RIPK1-RIPK3-caspase-8 pathway [37]. While  
334 inhibition of the TNFR pathway (using GSK963, necrosulfonamide, and GSK872) had no  
335 significant effect on infection (**Figure 4H**), IL-1 $\beta$  release was reduced in all cases. Possibly  
336 because HAdV-B35-lactoferrin complexes typically induced greater levels of IL-1 $\beta$  release,  
337 the effects of the caspase inhibitors tended to be more prominent (**Supplemental Figure 4A-C**  
338 for effect of inhibitors for each HAdV). Together, these data demonstrate that HAdV-  
339 lactoferrin complexes induce NLRP3 inflammasome formation and IL-1 $\beta$  release via a  
340 cathepsin B-mediated activation of caspase 1. Additionally, an autocrine effect of TNF may  
341 influence IL-1 $\beta$  release.

#### 342 **IL-1 $\beta$ release without the loss of membrane integrity**

343 In contrast to classic NLRP3 inflammasome activation, the alternative pathway does not  
344 include complete loss of cell membrane integrity (as based on LDH release into the  
345 extracellular space). This is thought to be due to ESCRT III pathway repairing pores in the  
346 plasma membrane induced by limited levels of GSDMD cleavage [38]. To determine if  
347 HAdV-lactoferrin complexes induce pores and the release of large intracellular proteins, we

348 quantified extracellular levels of L-lactate dehydrogenase (LDH) activity at 4 h postinfection.  
349 LDH activity in the supernatant of control and HAdV-lactoferrin complexes was not  
350 significantly different from HAdV or lactoferrin-treated controls (**Figure 5A**). To determine  
351 whether HAdV-lactoferrin complexes were able to have a long-term impact DC membrane  
352 integrity we add a fluorescent marker of viability (7-AAD) to the DCs and quantified 7-AAD<sup>+</sup>  
353 cells by flow cytometry. At 24 h post-challenge, the percentage of 7-AAD<sup>+</sup> cell induced by  
354 HAdV-lactoferrin complexes was greater than lactoferrin- or HAdV-challenged cells (**Figure**  
355 **5B**). Moreover, when lactoferrin was added to HAdV-IVIG complexes, we found an increase  
356 in the percentage of 7-AAD<sup>+</sup> DCs (**Supplemental Figure 5**). These data demonstrate that  
357 membrane integrity may be perturbed, but within the time frame of our assays cytosolic  
358 proteins are not released into the medium. Together, these data demonstrated that HAdV-  
359 lactoferrin complexes prime DCs for NLRP3-associated IL-1 $\beta$  release, inflammasome can be  
360 formed, membrane integrity is perturbed, but there is no significant leakage of cytoplasmic  
361 proteins.

## 362 Discussion

363 Deconstructionist approaches using binary systems to understand HAdV receptor engagement,  
364 trafficking, and immunogenicity provided a foundation to understand virus - cell interactions.  
365 Combinatorial assays using multiple human blood components can generate greater insight  
366 into clinically relevant HAdV issues, in particular tropism and immunogenicity. Here, we  
367 show how an alarmin influences the response of human DCs to three HAdV types. We  
368 examined pathways from receptor engagement, signaling, transcription, inflammasome  
369 formation/activation and cytokine release (**Figure 6**). Following engagement of TLR4, its TIR  
370 domain recruits MyD88 and TIRAP, which bridge TLRs to IRAK and MAPK family  
371 members that activate NF- $\kappa$ B, AP-1, and IRF. This latter pathway initiates transcription of  
372 genes coding for inflammasome components and proinflammatory cytokines [39,40]. The TIR  
373 domain also recruits TRAM and TRIF to activate the kinases TBK1 and IKK $\epsilon$  to promote type  
374 I IFN expression [30]. Together, these innate immune pathways prime an adaptive antiviral  
375 response.

376 Due in part to the technical advances in the synthesis of peptide-polymer conjugates, interest  
377 in new and old HDPs is flourishing. However, the complex biological functions of naturally  
378 occurring HDPs provide a candid reminder of how little we grasp their impact on immune  
379 responses to most pathogens. The three HAdV types used in this study were based on their  
380 state of development as vectors for vaccines [41,42]. HAdV-C5, -D26 and -B35 come from  
381 different HAdV species, and are associated with different vaccines efficacy. The *raison d'être*  
382 for the use of HAdV-D26 and -B35 is that their low seroprevalence (at least in Europeans and  
383 North Americans cohorts) and may circumvent some concerns associated with pre-existing  
384 HAdV humoral immunity [43]. It is worth noting that HAdV-B35 seroprevalence is typically  
385 rare – whether this is due to the lack of infection or lack of production of neutralizing  
386 antibodies to HAdV-B35 is currently unknown. Throughout this study HAdV-C5 and -D26  
387 tended to have similar profiles in all assays. By contrast, there were several instances where  
388 HAdV-B35 was notably different. Whether these differences can be attributed to the use of  
389 CD46 or differences in the level between monocytes, DCs or Langerhans is possible, but  
390 unexplored. In addition, work in T cells that shows CD46 primes the NLRP3 inflammasome  
391 and therefore a possible binary engagement through TLR4 and CD46 could impact the  
392 response to HAdV-B35-lactoferrin complexes [44]. The breadth of the lactoferrin-enhanced  
393 infection of the three HAdVs suggest that the interactions are charge based because of the

394 significant differences in the HVR sequences, which make up much of the surface area of  
395 HAdVs. Previous studies demonstrated that some HDPs attenuate HAdV infection of  
396 epithelial-like cells [8,15,45–48]. By contrast, our results are similar to Adams et al. [9] and  
397 demonstrated that lactoferrin-enhanced HAdV infection of human monocytes, DCs, and  
398 Langerhans cells. By delving deeper into these initial observations, our study sheds light onto  
399 the mechanisms by which an HDP connects HAdV infection of mucosal tissues, or during  
400 vaccination, to drive innate and adaptive immune responses. Mechanistically, it appears that  
401 lactoferrin reduces infection of epithelial cells and increases uptake into phagocytes, which  
402 provokes a pro-inflammatory and antiviral cytokine response. In combination with vaccination  
403 studies in paradigms of primary and recurrent infection, our study will help us understand how  
404 this pathway modifies adaptive immune responses against HAdV vectors and/or the transgene.

405 Classical NLRP3 inflammasome activation involves a two-step process: PRR-derived signal 1  
406 to upregulate transcription of inflammasome components and NLRP3 posttranslational  
407 modification. NLRP3 then detects perturbations of cellular integrity associated with K<sup>+</sup> efflux  
408 (signal 2). Consequently, Nek7–NLRP3 interaction leads to pyroptosome assembly and  
409 caspase-1-induced maturation of pro-IL-1 $\beta$  and pro-GSDMD. The alternative pathway  
410 consists of NLRP3-ASC-pro-caspase-1 signaling and IL-1 $\beta$  release without the loss of  
411 cytoplasmic content via GSDMD-induced pyroptosis. Yet, the alternative pathway delineated  
412 in this study is not an indisputable fit and likely reflects the variability between LPS and a  
413 HAdV. TLR4-mediated endocytosis, which is well characterized for LPS, depends on the  
414 homodimerization of TLR4. LPS, the quintessential TLR4 ligand, is extracted from gram<sup>-</sup>  
415 bacteria by CD14, which then transfer it to MD-2, which interacts directly with TLR4. TLR4  
416 dimerization is induced by the Lipid A region of LPS. Given the icosahedral shape and the  
417 size (~90 nm) of the HAdV-lactoferrin complex, one would expect that lactoferrin binds to  
418 multiple sites on the capsid and induced TLR4 dimerization directly, or possibly assemblage  
419 of multiple dimers. Dimerization is then associated with a CD14-dependent migration [49] to  
420 cholesterol-rich regions of the plasma membrane and endocytosis via a TLR4 ectodomain-  
421 dependent mechanism. While this picture appears partially consistent with the uptake HAdV  
422 particles, CD14 levels on monocytes-derived DCs are very low or absent, suggesting that  
423 migration to lipid rafts is via another pathway. The involvement of cathepsin B, a product of  
424 lysosomal rupture, is a key result. Most TLR4 agonists examined to date do not have complex  
425 intracellular processing. This is not the case for HAdVs. The endosomolytic activity of protein

426 VI, an internal capsid protein, prevents the efficient degradation of the HAdVs in DCs by  
427 enabling the escape of HAdV capsid from endocytic vesicles/lysosomes into the cytoplasm  
428 [50,51]. However, this trafficking process causes the HAdV double-stranded DNA genome  
429 become accessible to AIM2 (absent in melanoma 2) and in turn the initiation of an  
430 inflammasome. The makeup and processing of TLR4-associated vs. Fc $\gamma$  receptor-associated  
431 endocytic vesicles is, to the best of our knowledge, unknown. From the data here, it appears  
432 that TLR4-associated endocytic vesicles fused to the cathepsin B-bearing lysosomal vesicles  
433 before the rupture of these vesicles causes the inception of an NLRP3 inflammasome. Of note,  
434 we did not detect an involvement of the cGAS pathway (the inhibitor RU.512 had no effect on  
435 HAdV-mediated transgene expression or IL-1 $\beta$  release, data not shown) suggesting that in our  
436 assays TLR4-mediated endocytosis was not associated with significant degradation of the  
437 HAdV capsid. These data are consistent with increased GFP expression. By inhibiting caspase  
438 1, we showed that it is activated and involved in IL-1 $\beta$  release. This effect was specific for IL-  
439 1 $\beta$ , as TNF secretion did not decrease (**Supplemental Figure 6A**). Furthermore, caspase  
440 inhibitors had no effect on HAdV-lactoferrin entry (**Supplemental Figure 6B**). Caspase 1  
441 cleavage of GSDMD abolishes its intra-molecular auto-inhibition and induces pore-like  
442 structures of ~15 nm in diameter in the plasma membrane to breakdown the ion gradients.  
443 Alternative inflammasome activation can be triggered by a unique signal. LPS sensing induces  
444 a TLR4-TRIF-RIPK1-FADD-CASP8 signaling axis, resulting in activation of NLRP3 by  
445 cleavage of an unknown caspase-8 substrate independently of K<sup>+</sup> efflux. The alternative  
446 NLRP3 complex likely has a modified stoichiometry. Although caspase 1 becomes mature and  
447 cleaves IL-1 $\beta$ , pyroptosis is not induced and IL-1 $\beta$  release by an unconventional mechanism  
448 that functions independently of GSDMD. Why the inflammasome in HAdV-lactoferrin  
449 challenged cells does not lead to GSDMD-mediated release of cytoplasmic content may be  
450 due to the spatial and temporal signals the cell is receiving during the activation phase. In  
451 classic NLRP3 inflammasome activation, signal 1 is received well before signal 2 (NLRP3  
452 engagement). In our assays, HAdV-lactoferrin induced signals are received immediately  
453 before the NLRP3 induction. Notably though, inhibition of the NF- $\kappa$ B pathway had a dramatic  
454 effect on IL-1 $\beta$  levels. The lack of coordination of transcriptional priming and de-  
455 ubiquitination of NLRP3 [52] may preclude pyroptosis, and favor an immune response with a  
456 longer duration and trafficking of DC to lymph node to induce an adaptive immune responses.  
457 Inflammasome activation is thought to be crucial for the induction of cellular and humoral  
458 immune responses in the context of vaccinations. However, whether the involvement of the



459 HAdV-lactoferrin NLRP3 axis drives T-cell responses towards a Th1 or Th2 phenotype needs  
460 further analyses. By contrast, controlling excessive inflammatory response is necessary. In  
461 addition to the expression of IL-1 $\beta$ , we also found notable levels of IL-1 $\alpha$ . It is also possible  
462 that the effects of IL-1 $\alpha$  supersede or preclude pyroptosis because IL-1 $\alpha$  can promote the  
463 expression of genes involved in cell survival [53].

464 Of note, our results may also resolve one of many conundrums associated with the differences  
465 between murine and human responses to HAdVs. If murine HDPs interact with murine  
466 coagulation factors to bind HAdVs and induce a TLR4-associated pro-inflammatory response  
467 in the mouse liver [12], then the addition of ubiquitous HDPs into this picture could resolve  
468 the paradox. Whether HAdV-coagulation factor- HDP-HAdV complexes are produced  
469 following intravenous injection in mice has not been addressed. In conclusion, using  
470 combinatorial assays and primary human blood cells we detailed the multifaceted interactions  
471 between a PAMP (HAdV), a DAMP (lactoferrin), and PRRs (TLR4 & NLRP3) at the  
472 interface of innate and adaptive immunity in humans. These data directly address how the  
473 multiple layers of the innate and adaptive immune responses coordinate reactions to  
474 pathogens.

## 475 **Acknowledgments**

476 We thank the imaging facility MRI, member of the national infrastructure France-BioImaging  
477 supported by the French National Research Agency (ANR-10-INBS-04, “Investments for the  
478 future”). We thank Katryn Stacey (CHU Montpellier) for help with the inflammasome  
479 detection by flow cytometry. We thank EKL members for constructive comments.

## 480 **Author contributions:**

481 Study design & conception: KE, EJK  
482 Project direction: EJK  
483 Performed experiments; CC, KE, HT, TTPT, OP, CH  
484 Analyzed data: all authors  
485 Wrote the manuscript: CC, KE, HT & EJK  
486 Secured funding: EJK

487 **Data and materials availability:** All materials can be obtained through an MTA.

## 488 **References**

489 1. Lai Y, Gallo RL. AMPed up immunity: how antimicrobial peptides have multiple roles in  
490 immune defense. *Trends Immunol.* 2009;30: 131–141. doi:10.1016/j.it.2008.12.003

- 491 2. Nguyen LT, Haney EF, Vogel HJ. The expanding scope of antimicrobial peptide structures and  
492 their modes of action. *Trends Biotechnol.* Elsevier Ltd; 2011;29: 464–472.  
493 doi:10.1016/j.tibtech.2011.05.001
- 494 3. Calabro S, Tortoli M, Baudner BC, Pacitto A, Cortese M, O’Hagan DT, et al. Vaccine  
495 adjuvants alum and MF59 induce rapid recruitment of neutrophils and monocytes that  
496 participate in antigen transport to draining lymph nodes. *Vaccine.* 2011;29: 1812–1823.  
497 doi:10.1016/j.vaccine.2010.12.090
- 498 4. da Cunha NB, Cobacho NB, Viana JFC, Lima LA, Sampaio KBO, Dohms SSM, et al. The next  
499 generation of antimicrobial peptides (AMPs) as molecular therapeutic tools for the treatment of  
500 diseases with social and economic impacts. *Drug Discov Today.* 2017;22: 234–248.  
501 doi:10.1016/j.drudis.2016.10.017
- 502 5. Spadaro M, Montone M, Arigoni M, Cantarella D, Forni G, Pericle F, et al. Recombinant  
503 human lactoferrin induces human and mouse dendritic cell maturation via Toll-like receptors 2  
504 and 4. *FASEB J.* 2014;28: 416–429. doi:10.1096/fj.13-229591
- 505 6. Spadaro M, Caorsi C, Ceruti P, Varadhachary A, Forni G, Pericle F, et al. Lactoferrin , a major  
506 defense protein of innate immunity , is a novel maturation factor for human dendritic cells.  
507 2016;22: 2747–2757. doi:10.1096/fj.07-098038
- 508 7. de la Rosa G, Yang D, Tewary P, Varadhachary A, Oppenheim JJ. Lactoferrin acts as an  
509 alarmin to promote the recruitment and activation of APCs and antigen-specific immune  
510 responses. *J Immunol.* 2008;180: 6868–6876. doi:10.4049/jimmunol.180.10.6868
- 511 8. Smith JG, Silvestry M, Lindert S, Lu W, Nemerow GR, Stewart PL. Insight into the  
512 mechanisms of adenovirus capsid disassembly from studies of defensin neutralization. *PLoS*  
513 *Pathog.* 2010;6: e1000959.
- 514 9. Adams WC, Bond E, Havenga MJE, Holterman L, Goudsmit J, Karlsson Hedestam GB, et al.  
515 Adenovirus serotype 5 infects human dendritic cells via a coxsackievirus-adenovirus receptor-  
516 independent receptor pathway mediated by lactoferrin and DC-SIGN. *J Gen Virol.* 2009;90:  
517 1600–1610. doi:10.1099/vir.0.008342-0
- 518 10. Uchio E, Inoue H, Kadonosono K. Anti-adenoviral effects of human cationic antimicrobial  
519 protein-18/LL-37, an antimicrobial peptide, by quantitative polymerase chain reaction. *Korean J*  
520 *Ophthalmol.* 2013;27: 199–203. doi:10.3341/kjo.2013.27.3.199
- 521 11. Johansson C, Jonsson M, Marttila M, Persson D, Fan XL, Skog J, et al. Adenoviruses use  
522 lactoferrin as a bridge for CAR-independent binding to and infection of epithelial cells. *J Virol.*  
523 2007;81: 954–963.
- 524 12. Doronin K, Flatt JW, Di Paolo NC, Khare R, Kalyuzhniy O, Acchione M, et al. Coagulation  
525 factor X activates innate immunity to human species C adenovirus. *Science (80).* 2012;338:  
526 795–798. doi:10.1126/science.1226625
- 527 13. Eichholz K, Mennechet FJD, Kremer EJ. Coagulation factor X-adenovirus type 5 complexes  
528 poorly stimulate an innate immune response in human mononuclear phagocytes. *J Virol.*  
529 2015;89: 2884–2891. doi:10.1128/JVI.03576-14
- 530 14. Weaver EA, Barry MA. Low seroprevalent species D adenovirus vectors as influenza vaccines.  
531 *PLoS One.* 2013;8: 1–14. doi:10.1371/journal.pone.0073313
- 532 15. Smith JG, Nemerow GR. Mechanism of adenovirus neutralization by Human alpha-defensins.  
533 *Cell Host Microbe.* 2008/01/15. 2008;3: 11–19. doi:S1931-3128(07)00308-3  
534 doi:10.1016/j.chom.2007.12.001
- 535 16. Sester DP, Thygesen SJ, Sagulenko V, Vajjhala PR, Cridland JA, Vitak N, et al. A novel flow  
536 cytometric method to assess a novel flow cytometric method to assess inflammasome  
537 formation. *J Immunol.* 2015;194: 455–462. doi:10.4049/jimmunol.1401110

- 538 17. Eichholz K, Bru T, Tran TTP, Fernandes P, Welles H, Mennechet FJD, et al. Immune-  
539 complexed adenovirus induce AIM2-mediated pyroptosis in human dendritic cells. *PLoS*  
540 *Pathog.* 2016;12. doi:10.1371/journal.ppat.1005871
- 541 18. Arnberg N. Adenovirus receptors: implications for tropism, treatment and targeting. *Rev Med*  
542 *Virol.* 2009;19: 165–178.
- 543 19. Baker AT, Mundy RM, Davies JA, Rizkallah PJ, Parker AL. Human adenovirus type 26 uses  
544 sialic acid-bearing glycans as a primary cell entry receptor. *Sci Adv.* 2019;5: 2–11.  
545 doi:10.1126/sciadv.aax3567
- 546 20. Gaggar A, Shayakhmetov DM, Lieber A. CD46 is a cellular receptor for group B adenoviruses.  
547 *Nat Med.* 2003;9: 1408–1412.
- 548 21. Günther PS, Mikeler E, Hamprecht K, Schneider-Schaulies J, Jahn G, Dennehy KM.  
549 CD209/DC-SIGN mediates efficient infection of monocyte-derived dendritic cells by clinical  
550 adenovirus 2C isolates in the presence of bovine lactoferrin. *J Gen Virol.* 2011;92: 1754–1759.  
551 doi:10.1099/vir.0.030965-0
- 552 22. Tran TTP, Eichholz K, Amelio P, Moyer C, Nemerow GR, Perreau M, et al. Humoral immune  
553 response to adenovirus induce tolerogenic bystander dendritic cells that promote generation of  
554 regulatory T cells. *PLoS Pathog.* 2018;14: 1–31. doi:10.1371/journal.ppat.1007127
- 555 23. Ando K, Hasegawa K, Shindo KI, Furusawa T, Fujino T, Kikugawa K, et al. Human lactoferrin  
556 activates NF- $\kappa$ B through the Toll-like receptor 4 pathway while it interferes with the  
557 lipopolysaccharide-stimulated TLR4 signaling. *FEBS J.* 2010;277: 2051–2066.  
558 doi:10.1111/j.1742-4658.2010.07620.x
- 559 24. Nagaoka I, Hirota S, Niyonsaba F, Hirata M, Adachi Y, Tamura H, et al. Cathelicidin Family of  
560 Antibacterial Peptides CAP18 and CAP11 Inhibit the Expression of TNF- by Blocking the  
561 Binding of LPS to CD14+ Cells. *J Immunol.* 2001;167: 3329–3338.  
562 doi:10.4049/jimmunol.167.6.3329
- 563 25. Scott MG, Vreugdenhil ACE, Buurman WA, Hancock REW, Gold MR. Cationic Antimicrobial  
564 Peptides Block the Binding of Lipopolysaccharide (LPS) to LPS Binding Protein. *J Immunol.*  
565 2000;164: 549–553. doi:10.4049/jimmunol.164.2.549
- 566 26. Shimazu R, Akashi S, Ogata H, Nagai Y, Fukudome K, Miyake K, et al. MD-2, a Molecule that  
567 Confers Lipopolysaccharide Responsiveness on Toll-like Receptor 4. *J Exp Med.* 1999;189:  
568 1777–1782. doi:10.1084/jem.189.11.1777
- 569 27. Zanoni I, Ostuni R, Marek LR, Barresi S, Barbalat R, Barton GM, et al. CD14 controls the  
570 LPS-induced endocytosis of Toll-like receptor 4. *Cell.* Elsevier Inc.; 2011;147: 868–880.  
571 doi:10.1016/j.cell.2011.09.051
- 572 28. Rallabhandi P, Phillips RL, Marina S. Respiratory Syncytial Virus Fusion Protein-Induced Toll-  
573 Like Receptor 4 (TLR4) Signaling Is Inhibited by the TLR4 Antagonists *Rhodobacter*  
574 *sphaeroides* Lipopolysaccharide and Eritoran (E5564) and Requires Direct Interaction with  
575 MD-2. *MBio.* 2012;3: e00218--12. doi:10.1128/mBio.00218-12.Editor
- 576 29. Deguchi A, Tomita T, Omori T, Komatsu A, Ohto U, Takahashi S, et al. Serum amyloid A3  
577 binds MD-2 to activate p38 and NF- $\kappa$ B pathways in a MyD88-dependent manner. *J Immunol.*  
578 2013;191: 1856–1864. doi:10.4049/jimmunol.1201996
- 579 30. Yamamoto M, Sato S, Hemmi H, Uematsu S, Hoshino K, Kaisho T, et al. TRAM is specifically  
580 involved in the Toll-like receptor 4-mediated MyD88-independent signaling pathway. *Nat*  
581 *Immunol.* 2003;4: 1144–1150. doi:10.1038/ni986
- 582 31. Fitzgerald KA, Rowe DC, Barnes BJ, Caffrey DR, Visintin A, Latz E, et al. LPS-TLR4  
583 Signaling to IRF-3/7 and NF- $\kappa$ B Involves the Toll Adapters TRAM and TRIF. *J Exp Med.*  
584 2003;198: 1043–1055. doi:10.1084/jem.20031023

- 585 32. Kagan JC, Su T, Horng T, Chow A, Akira S, Medzhitov R. TRAM couples endocytosis of Toll-  
586 like receptor 4 to the induction of interferon- $\beta$ . *Nat Immunol.* 2008;9: 361–368.  
587 doi:10.1038/ni1569
- 588 33. Persson BD, Lenman A, Frångsmyr L, Schmidt M, Ahlm C, Plückthun A, et al. Lactoferrin-  
589 hexon interactions mediate CAR-independent adenovirus infection of human respiratory cells. *J*  
590 *Viol.* 2020;(in press). doi:10.1128/JVI.00542-20
- 591 34. He Y, Hara H, Núñez G. Mechanism and Regulation of NLRP3 Inflammasome Activation.  
592 *Trends Biochem Sci.* 2016;41: 1012–1021. doi:10.1016/j.tibs.2016.09.002
- 593 35. Gaidt MM, Hornung V. Alternative inflammasome activation enables IL-1 $\beta$  release from living  
594 cells. *Curr Opin Immunol.* 2017;44: 7–13. doi:10.1016/j.coi.2016.10.007
- 595 36. Gaidt MM, Ebert TS, Chauhan D, Schmidt T, Schmid-Burgk JL, Rapino F, et al. Human  
596 Monocytes Engage an Alternative Inflammasome Pathway. *Immunity.* 2016;44: 833–846.  
597 doi:10.1016/j.immuni.2016.01.012
- 598 37. Najjar M, Saleh D, Zelic M, Nogusa S, Shah S, Tai A, et al. RIPK1 and RIPK3 Kinases  
599 Promote Cell-Death-Independent Inflammation by Toll-like Receptor 4. *Immunity.* 2016;45:  
600 46–59. doi:10.1016/j.immuni.2016.06.007
- 601 38. Rühl S, Shkarina K, Demarco B, Heilig R, Santos JC, Broz P. ESCRT-dependent membrane  
602 repair negatively regulates pyroptosis downstream of GSDMD activation. *Science (80- )*.  
603 2018;362: 956–960. doi:10.1126/science.aar7607
- 604 39. Horng T, Barton GM, Flavell RA, Medzhitov R. The adaptor molecule TIRAP provides  
605 signalling specificity for Toll-like receptors. *Nature.* *Nature*; 2002;420: 329–333.  
606 doi:10.1038/nature01180
- 607 40. Yamamoto M, Sato S, Hemmi H, Sanjo H, Uematsu S, Kaisho T, et al. Essential role for  
608 TIRAP in activation of the signalling cascade shared by TLR2 and TLR4. *Nature.* 2002;420:  
609 324–9. doi:10.1038/nature01182
- 610 41. Ertl HC. Viral vectors as vaccine carriers. *Curr Opin Virol.* 2016;21: 1–8.  
611 doi:10.1016/j.coviro.2016.06.001
- 612 42. Mast TC, Kierstead L, Gupta SB, Nikas AA, Kallas EG, Novitsky V, et al. International  
613 epidemiology of human pre-existing adenovirus (Ad) type-5, type-6, type-26 and type-36  
614 neutralizing antibodies: correlates of high Ad5 titers and implications for potential HIV vaccine  
615 trials. *Vaccine.* 2010;28: 950–957. doi:10.1016/j.vaccine.2009.10.145
- 616 43. Mennechet FJDD, Paris O, Ouoba AR, Salazar Arenas S, Sirima SB, Takoudjou Dzomo GR, et  
617 al. A review of 65 years of human adenovirus seroprevalence. *Expert Rev Vaccines.* 2019;18:  
618 597–613. doi:10.1080/14760584.2019.1588113
- 619 44. Arbore G, West EE, Spolski R, Robertson AAB, Klos A, Rheinheimer C, et al. T helper 1  
620 immunity requires complement-driven NLRP3 inflammasome activity in CD4+ T cells. *Science*  
621 *(80- )*. 2016;352: aad1210–aad1210. doi:10.1126/science.aad1210
- 622 45. Bastian A, Schafer H. Human alpha-defensin 1 (HNP-1) inhibits adenoviral infection in vitro.  
623 *Regul Pept.* 2001;101: 157–161.
- 624 46. Pietrantoni A, Maria A, Biase D, Tinari A, Marchetti M, Valenti P, et al. Bovine Lactoferrin  
625 Inhibits Adenovirus Infection by Interacting with Viral Structural Polypeptides Bovine  
626 Lactoferrin Inhibits Adenovirus Infection by Interacting with Viral Structural Polypeptides.  
627 2003; doi:10.1128/AAC.47.8.2688
- 628 47. Arnold D, Di Biase AM, Marchetti M, Pietrantoni A, Valenti P, Seganti L, et al. Antiadenovirus  
629 activity of milk proteins: Lactoferrin prevents viral infection. *Antiviral Res.* 2002;53: 153–158.  
630 doi:10.1016/S0166-3542(01)00197-8

- 631 48. Gordon YJ, Huang LC, Romanowski EG, Yates KA, Proske RJ, McDermott AM. Human  
632 cathelicidin (LL-37), a multifunctional peptide, is expressed by ocular surface epithelia and has  
633 potent antibacterial and antiviral activity. *Curr Eye Res.* 2005;30: 385–394.  
634 doi:10.1080/02713680590934111
- 635 49. Triantafilou M, Miyake K, Golenbock DT, Triantafilou K. Mediators of innate immune  
636 recognition of bacteria concentrate in lipid rafts and facilitate lipopolysaccharide-induced cell  
637 activation. *J Cell Sci.* 2002;115: 2603–2611.
- 638 50. Wiethoff CM, Nemerow GR. Adenovirus membrane penetration: Tickling the tail of a sleeping  
639 dragon. *Virology.* 2015;479–480: 591–599. doi:10.1016/j.virol.2015.03.006
- 640 51. Moyer CL, Nemerow GR. Disulfide-bond formation by a single cysteine mutation in  
641 adenovirus protein VI impairs capsid release and membrane lysis. *Virology.* 2012;428: 41–47.  
642 doi:10.1016/j.virol.2012.03.024
- 643 52. Py BF, Kim MS, Vakifahmetoglu-Norberg H, Yuan J. Deubiquitination of NLRP3 by BRCC3  
644 Critically Regulates Inflammasome Activity. *Mol Cell.* 2013;49: 331–338.  
645 doi:10.1016/j.molcel.2012.11.009
- 646 53. Netea MG, van de Veerdonk FL, van der Meer JWM, Dinarello CA, Joosten LAB.  
647 Inflammasome-Independent Regulation of IL-1-Family Cytokines. *Annu Rev Immunol.*  
648 2015;33: 49–77. doi:10.1146/annurev-immunol-032414-112306
- 649

## 650 **Figure Legends**

### 651 **Figure 1. Lactoferrin binds to HAdVs and increase infectivity in DCs**

- 652 **A)** Representative sensorgrams of lactoferrin binding to the HAdV capsid as assessed by surface  
653 plasmon resonance. HAdV-C5 (red), HAdV-D26 (black), and HAdV-B35 (blue) were covalently  
654 coupled to a CM5 sensor chip and lactoferrin was injected for binding comparison. For  $K_D$   
655 determination a range of 6.25 - 200 nM of lactoferrin was injected and the  $K_D$  was calculated using  
656 a bivalent fitting model (RU = resonance units);
- 657 **B)** Relative affinity ( $K_D$ ) of lactoferrin for HAdV-C5, -D26 and -B35 capsids;
- 658 **C)** Representative flow cytometry profiles of DCs incubated with the HAdV vectors. DCs were  
659 mock-treated (grey) or incubated with HAdV species-C5 (5,000 pp/cell), -D26 (20,000 pp/cell) or  
660 -B35 (1,000 pp/cell) (red) or complexed with lactoferrin (blue) for 24 h. Samples were collected at  
661 24 h, prepared for flow cytometry and 25,000 events were acquired/sample.
- 662 **D)** Cumulative data (n = 21) from DCs generated from blood bank donors.

### 663 **Figure 2. HAdV-lactoferrin complexes induce IL-1 $\alpha$ and IL-1 $\beta$**

- 664 **A)** DCs were incubated with HAdV-C5, HAdV-D26, and HAdV-B35  $\pm$  lactoferrin (or LPS as a  
665 positive control) for 4 h and cytokines secretion in supernatants was assessed by Luminex. To the  
666 left of each set of columns is the baseline reference set: for the left-hand columns the baseline is  
667 mock-infected cells, for the middle columns the reference is lactoferrin-treated cells, for the right-  
668 hand columns the reference is HAdV-infected cells. Raw data can be found in (Supplemental  
669 Figure 2A & B).
- 670 **B)** IL-1 $\beta$  release by DCs in the presence of HAdV-C5, -D26, and -B35  $\pm$  lactoferrin was assessed by  
671 ELISA at 4 (red) and 24 h (black) postinfection (n = 3). As control, cells were treated with LPS  
672 (TLR4 agonist) and nigericin (activated the inflammasome).
- 673 **C-D)** DCs were incubated with HAdV complexed with lactoferrin, IVIG or lactoferrin + IVIG, for 4 h.  
674 Infection and IL-1 $\beta$  release, respectively, were analyzed 24 h postinfection (n = 3). Statistical  
675 analyses by two-tailed Mann-Whitney test.

### 676 **Figure 3. Blocking TLR4 engagement and signaling decrease HAdV-lactoferrin entry 677 and DC maturation**

- 678 **A)** HAdV-lactoferrin complexes were incubate with TLR4/MD-2 recombinant protein for 30 min.  
679 Infection was analyzed 24 h postinfection by flow cytometry (n = 11);
- 680 **B)** DCs were treated for 1 h pre-infection with TAK-242, HAdV-lactoferrin complex infection was  
681 analyzed 24 h postinfection by flow cytometry (n  $\geq$  3). Cytokine profile of DCs treated HAdV-  
682 lactoferrin  $\pm$  TAK-242;
- 683 **C)** IL-1 $\beta$  release following inhibition with TAK-242;
- 684 **D)** TNF levels 24 h postinfection  $\pm$  TAK-242 (n  $\geq$  3);
- 685 **E)** Percent infection following inhibition with oxPAPC (n = 6);
- 686 **F)** Percent infection following inhibition with Pepinh-TRIF, R406 or Bay11-7082 (n = 6).
- 687 **G)** IL-1 $\beta$  release from DCs incubated with HAdV-lactoferrin  $\pm$  oxPAPC, Pepinh-TRIF, R406 or  
688 Bay11-7082 (n  $\geq$  3). Statistical analyses by two-tailed Mann-Whitney test.

### 689 **Figure 4. HAdV-lactoferrin complexes induce IL-1 $\beta$ via an NLRP3 inflammasome**

- 690 **A)** mRNA expression of inflammasome components NLRP3 (NLRP3), caspase 1 (CASP1), pro-IL-  
691 1 $\beta$  (IL1B) and TNF (TNF) induced by HAdV-lactoferrin complex was assessed by RT-qPCR at 4  
692 h postinfection;
- 693 **B)** Flow cytometry-based assay for ASC aggregation (pyroptosome formation); Inflammasome  
694 formation was induced by incubating DCs with HAdV-C5- lactoferrin complexes for 3 h. LPS +

695 nigericin and HAdV-C5-IVIG complexes were used as positive controls to identify  
696 inflammasome-positive cells. MCC-950 was used as a control of NLRP3 inhibition and lactoferrin  
697 on DCs was use as a negative control. Cells were stained with anti-ASC. Inflammasome-positive  
698 cells were identified as ASC-width low and ASC-height high.

699 C) IL-1 $\beta$  release in response to HAdV-lactoferrin complex or LPS/nigericin in DCs pre-treated with  
700 NLRP3 pathway or caspase-1 inhibitor. IL-1 $\beta$  release in response to HAdV-lactoferrin complexes  
701 in DCs pre-treated with C) KCl, NAC, and MDL; D) NLRP3 inhibitor MCC-950; E-F) caspase-1  
702 inhibitors WEDH, YVAD, VX765; G) caspase-8 inhibitor Z-IETD, H) RIPK1 inhibitor GSK963,  
703 and RIPK3 inhibitors necrosulfonamide and GSK872. N  $\geq$  3 in all assays. Statistical analyses by  
704 two-tailed Mann-Whitney test.

#### 705 **Figure 5. IL-1 $\beta$ release without the loss of membrane integrity**

706 A) DCs were challenged with HAdV-lactoferrin complexes, HAdV alone, or LPS/nigericin. Loss of  
707 cytosolic content was quantified by LDH activity in the supernatant at 4 h postinfection (n = 6);  
708 B) Plasma membrane integrity, analyzed 24 h postinfection using 7-AAD uptake, was quantified  
709 using flow cytometry (n = 13). Statistical analyses by two-tailed Mann-Whitney test.

#### 710 **Figure 6. TLR4-mediated HAdV-lactoferrin uptake in DCs and IL-1 $\beta$ release**

711 Lactoferrin binds to HAdV capsid and retargets the virus toward TLR4 complex on the cells surface.  
712 Following TLR4 engagement, its TIR domain recruits MyD88 and TIRAP, which bridge TLRs to  
713 IRAK and MAPK family members that activate NF- $\kappa$ B, AP-1, and IRF. This is a transcriptional  
714 priming event that initiating expression of genes coding for inflammasome components (e.g. NLRP3  
715 and IL-1 $\beta$ ). The DC then detects a second perturbations (signal 2) which induced ROS release  
716 (mitochondrial stress) or K<sup>+</sup> efflux (perturbations of cellular integrity), and cathepsin B release from  
717 lysosome rupture. HAdV-lactoferrin complexes induce RIPK1/3 pathway through autocrine-TNF  
718 release or RIPK3 activation via TRIF. During inflammasome formation, pro-caspase-1 auto-  
719 activation induces cleavage of pro-IL-1 $\beta$  and likely GSDMD, which will initiate the loss of plasma  
720 membrane integrity via pore formation, allowing IL-1 $\beta$  release. Twenty-four hours post-challenge,  
721 DCs membrane integrity is intact, consistent with the involvement of ESCRT-III complex and  
722 repairing GSDMD pores.

## 723 **Supplementary Materials**

### 724 **Figure S1: Analysis of lactoferrin binding to HAdV-C5, -D26 and -B35 by SPR**

725 **A)** HAdV-C5, HAdV-D26, and HAdV-B35 were covalently couple to a CM5 sensor chip and  
726 escalating doses of lactoferrin (6.25-200 nM) for  $K_D$  determination. Depicted are overlaid sensorgrams  
727 (RU = resonance units);

728 **B)** Representative flow cytometry profiles of cells infected with HAdV vectors. DCs were mock-  
729 treated (grey), incubated with HAdV species -C5, -D26 and -B35 alone (red), with lactoferrin  
730 complexed with HAdV (blue), with HAdV for 30 min and then lactoferrin (green) or with lactoferrin  
731 for 30 min and then HAdV (purple). Fluorescence was analyzed 24 h postinfection;

732 **C)** monocytes and **D)** LCs were incubated with HAdVs  $\pm$  lactoferrin and fluorescence was analyzed 24  
733 h postinfection (n = 3).

### 734 **Figure S2: HAdV-lactoferrin complexes induce cytokine secretion**

735 **A)** Raw data of Luminex assay of DCs  $\pm$  HAdVs  $\pm$  lactoferrin, plus controls.

736 **B-C)** Freshly isolate human monocytes incubated with HAdV-C5-, HAdV-D26, and HAdV-B35  $\pm$   
737 lactoferrin. The supernatants were used to quantify IL-1 $\beta$  release, GFP expression is reported median  
738 fluorescent index (MFI), respectively (n = 3)

739 **D)** DCs were incubate with HAdV-lactoferrin complexes for 24 h. Cells were then incubated at 4°C or  
740 37°C for 30 min with 1 mg/ml Texas Red-labelled dextran, washed with PBS, and immediately  
741 analyzed by flow cytometry to determine DC functional maturation (lower fluorescence = lower  
742 phagocytosis = greater maturation, n = 2).

### 743 **Figure S3: TLR4 inhibitors reduce infection of HAdV-lactoferrin complexes**

744 **A)** HAdV-lactoferrin complexes were incubate with TLR4, TLR4/MD-2, MD-2 recombinant proteins  
745 or DCs were incubated with anti-CD14 antibody for 30 min. Then HAdV-lactoferrin-recombinant  
746 protein complexes were added to DCs or HAdV-lactoferrin were added to treated DCs. Infection was  
747 analyzed 24 h postinfection by flow cytometry (n = 4).

748 **B-D)** DCs, monocytes, or LCs were treated for 1 h pre-infection with 1  $\mu$ g/ml of TAK-242. HAdV-  
749 lactoferrin complex infection was analyzed 24 h postinfection by flow cytometry (n = 3).

750 TLR4 surface expression was analyzed at 24 h after DCs treatment with decrease concentrations of **E)**  
751 lactoferrin (7 - 0.9  $\mu$ g/ml), **F)** TAK-242 (200 - 25  $\mu$ g/ml), **G)** oxPAPC (60 - 7.5  $\mu$ g/ml) or Pepinh-  
752 TRIF (50 - 6.25  $\mu$ g/ml) (n  $\geq$  3).

753 HAdV were complexed with lactoferrin or with lactoferricin (a gift from H. Jenssen, Roskilde  
754 Universitet).

755 **H-I)** DC infection and IL-1 $\beta$  release were analyzed at 24 h postinfection, respectively (n = 4).  
756 Statistical analyses by two-tailed Mann-Whitney test.

### 757 **Figure S4: Pharmacological inhibition organized by HAdV type**

758 DCs were treated for 1 h pre-infection with TLR4 inhibitors oxPAPC, Pepinh-TRIF, Syk  
759 inhibitor R406, NLRP3 inhibitor Bay11-7082, RIPK1 inhibitor GSK963 and RIPK3 inhibitors  
760 necrosulfonamide and GSK872 (n  $\geq$  3). Cells were infected with **A)** HAdV-C5-lactoferrin, **B)**  
761 HAdV-D26-lactoferrin or **C)** HAdV-B35-lactoferrin complexes and IL-1 $\beta$  release was  
762 analyzed 24 h postinfection (n  $\geq$  3). Statistical analyses by two-tailed Mann-Whitney test.

### 763 **Figure S5: Lactoferrin combined with IVIG induced 7-AAD uptake**

764 DCs were incubated with HAdV complexed with lactoferrin, IVIG or lactoferrin + IVIG. Plasma  
765 membrane integrity was analyzed by 7-AAD uptake by flow cytometry at 24 h postinfection (n = 3).  
766 Statistical analyses by two-tailed Mann-Whitney test.



767 **Figure S6: Caspase-1 and -8 inhibitors do not impact TNF secretion or infection**

768 DCs were treated with caspase-1 inhibitors (YVAD or VX765) or caspase-8 inhibitor (Z-IETD) for 1 h.

769 Cells were infected with HAdV-lactoferrin complexes for 24 h.

770 **A-B**) Supernatant was collected for TNF quantification; and, **C**) cells for GFP expression (flow

771 cytometry) ( $n \geq 4$ ). Statistical analyses by two-tailed Mann-Whitney test.

**FIGURE 1**

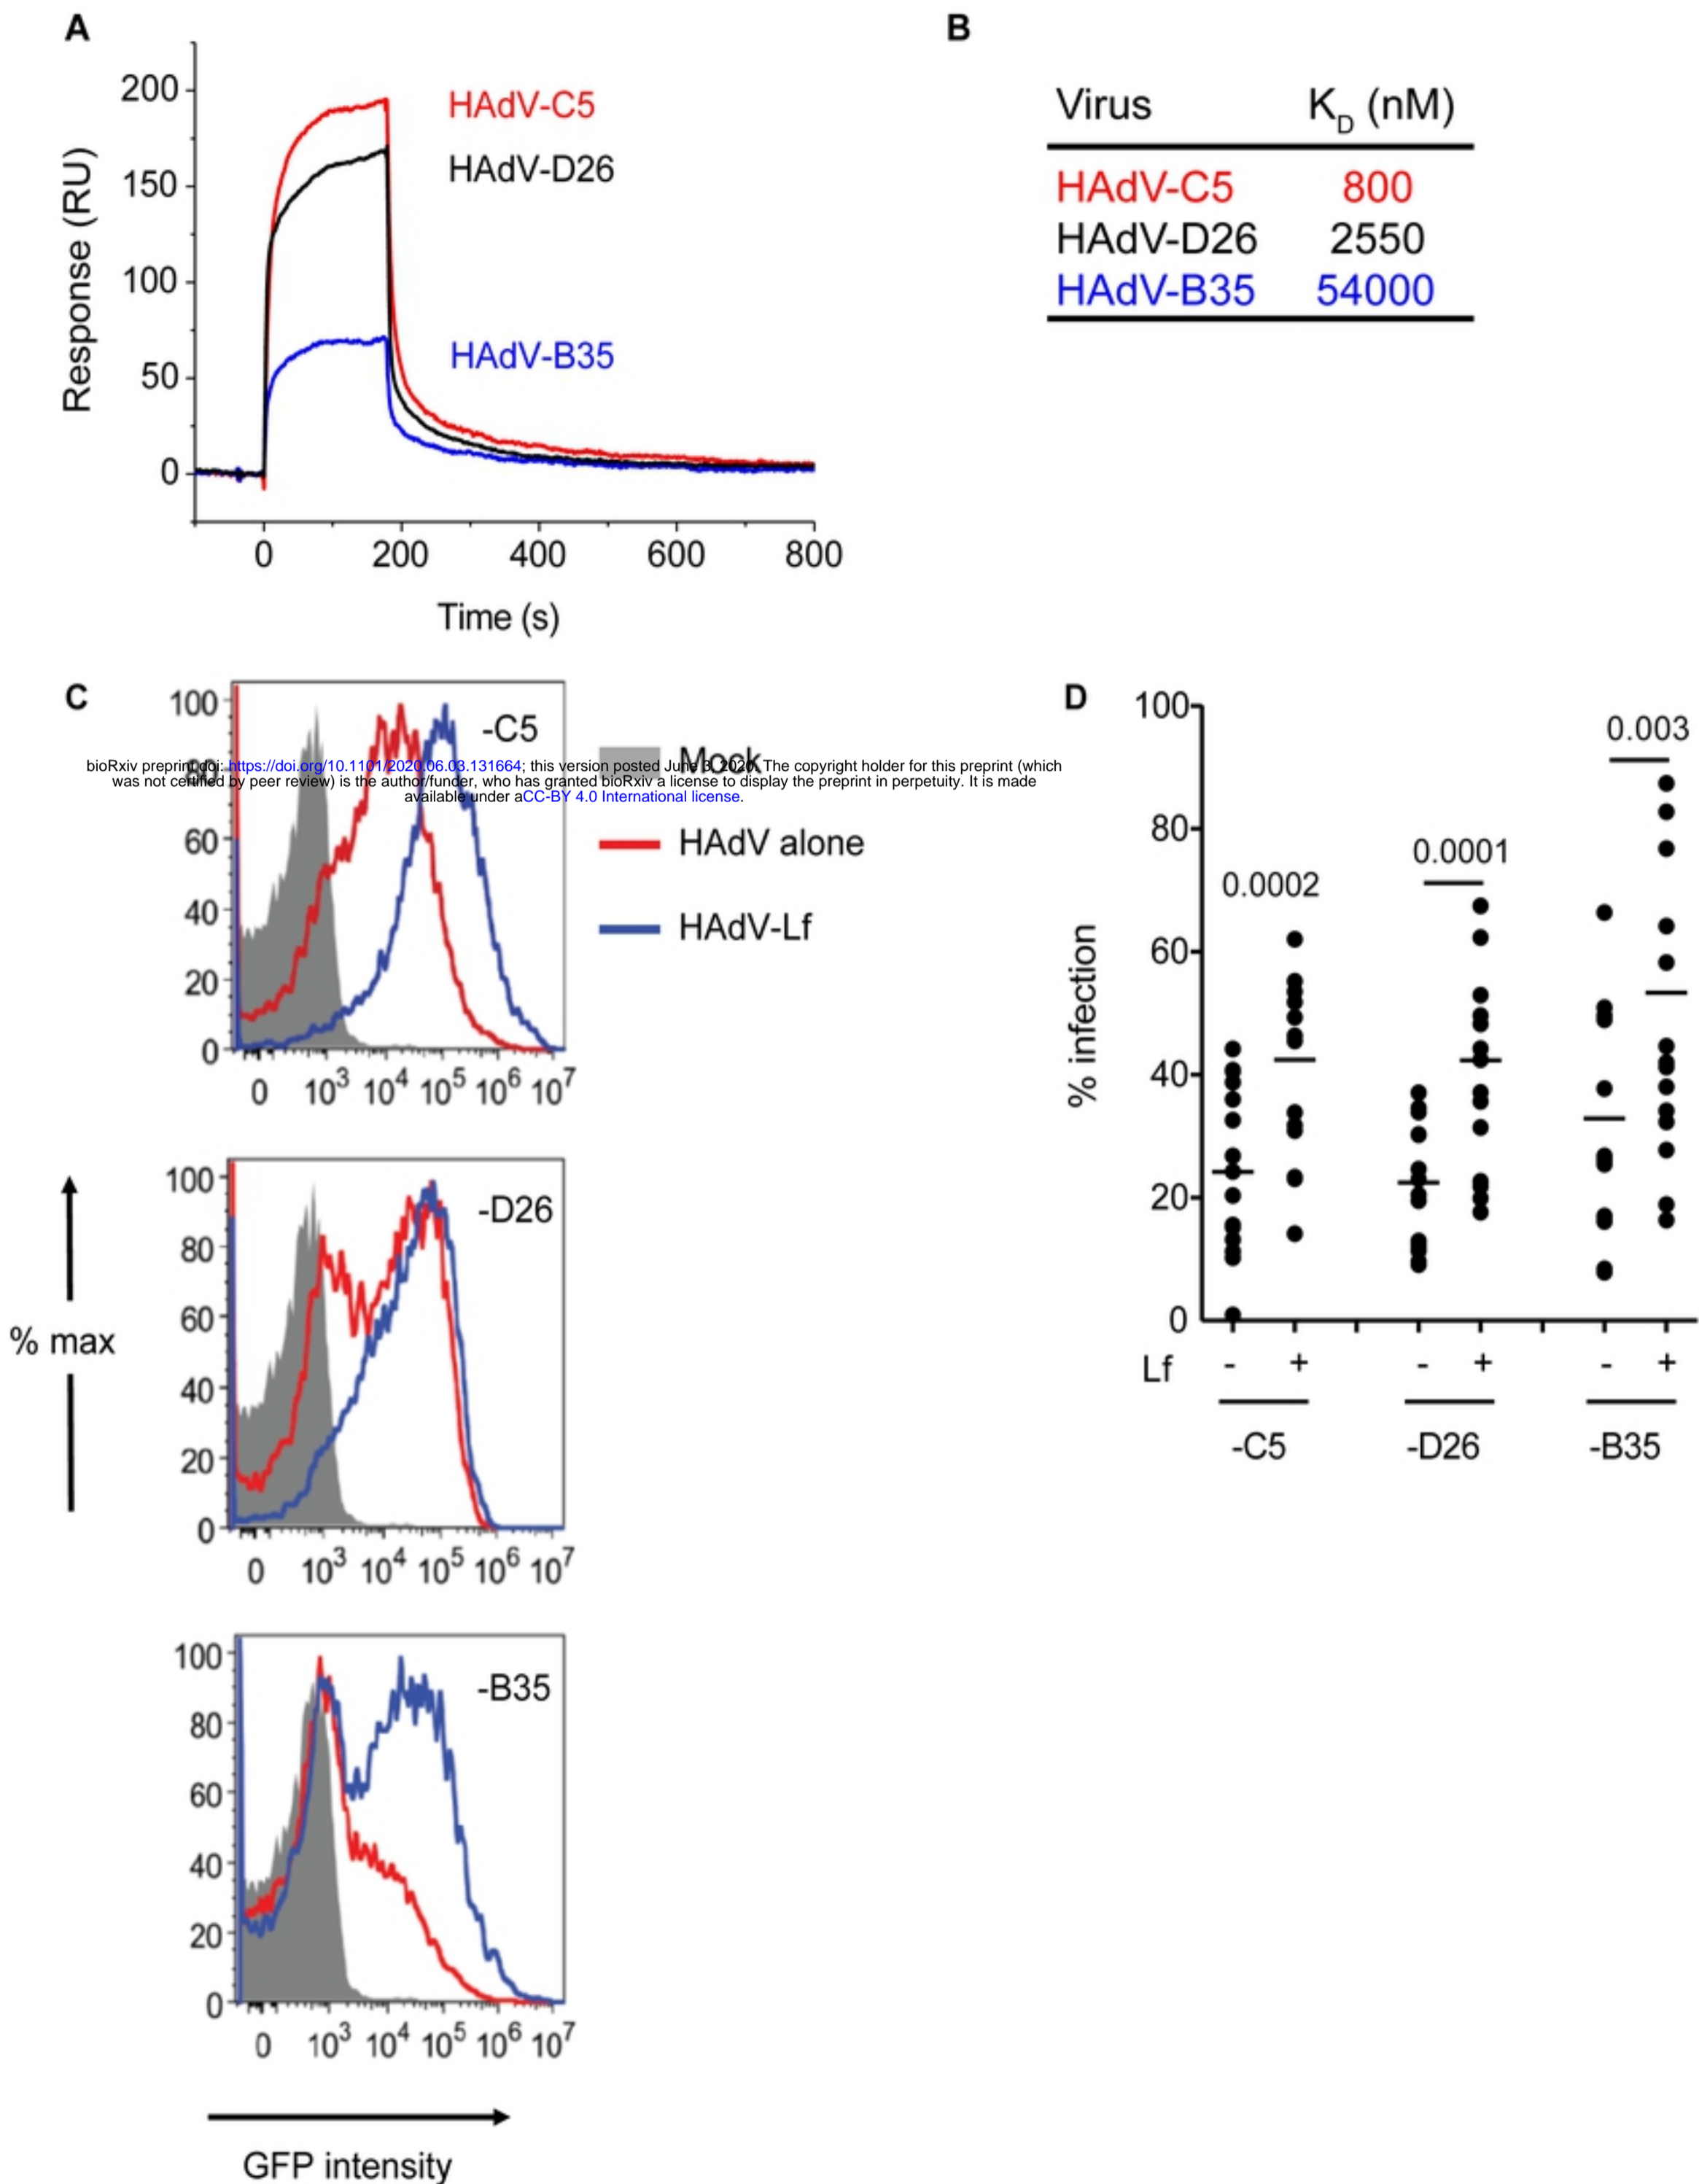

**Fig 1**

**FIGURE 2**

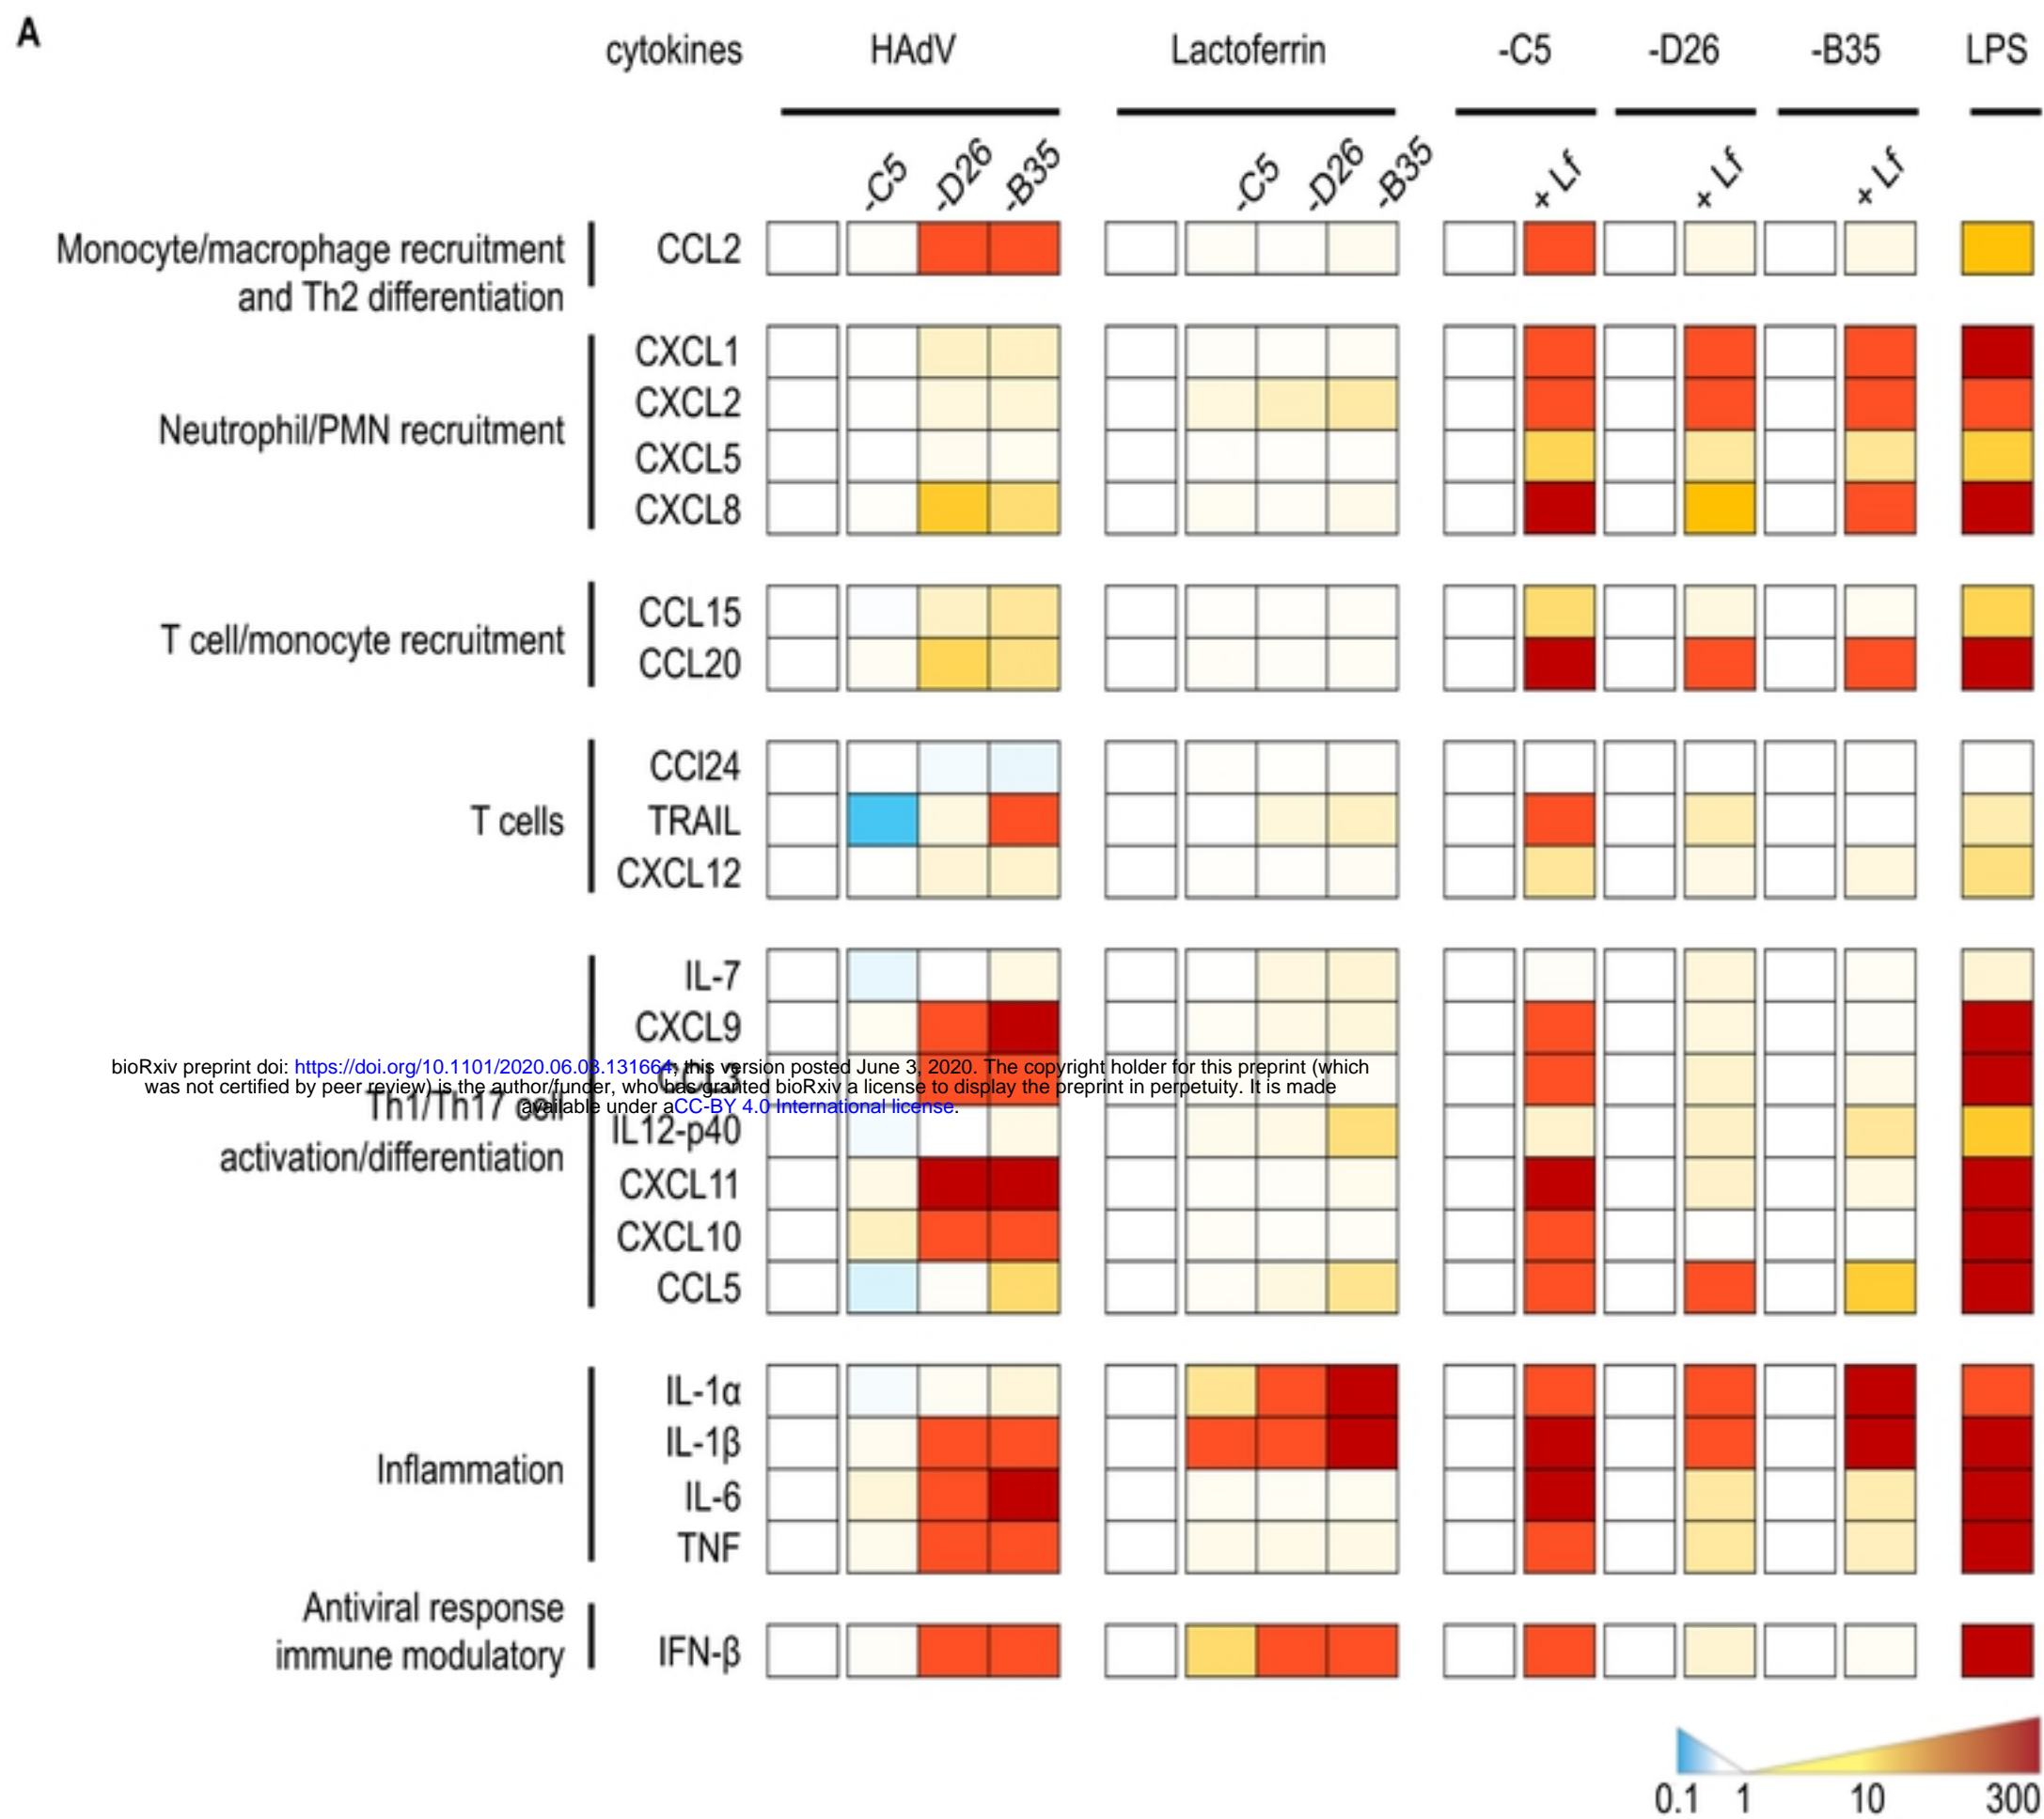

bioRxiv preprint doi: <https://doi.org/10.1101/2020.06.03.131664>; this version posted June 3, 2020. The copyright holder for this preprint (which was not certified by peer review) is the author/funder, who has granted bioRxiv a license to display the preprint in perpetuity. It is made available under aCC-BY 4.0 International license.

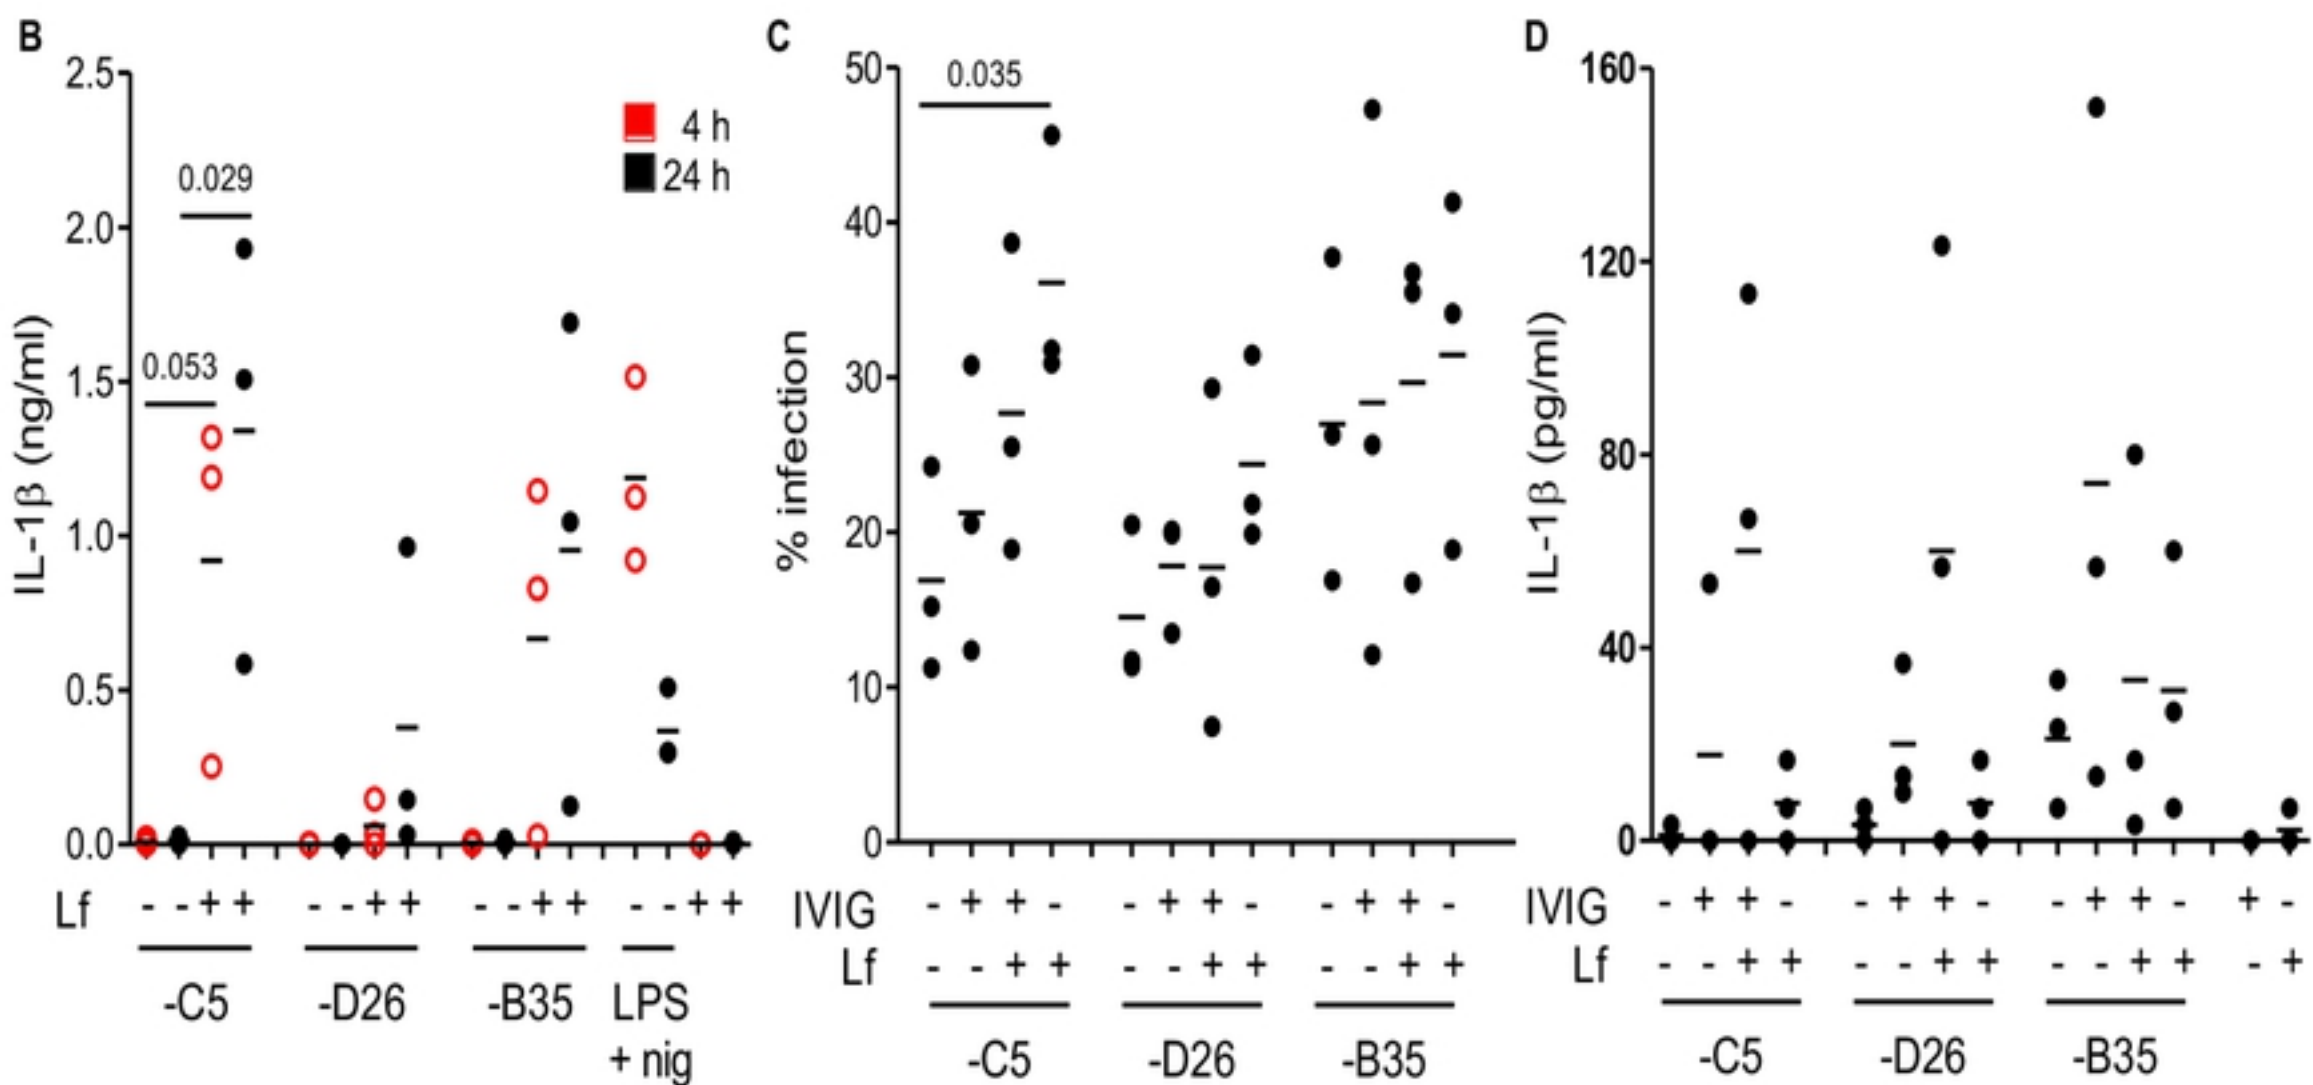

**Fig 2**

FIGURE 3

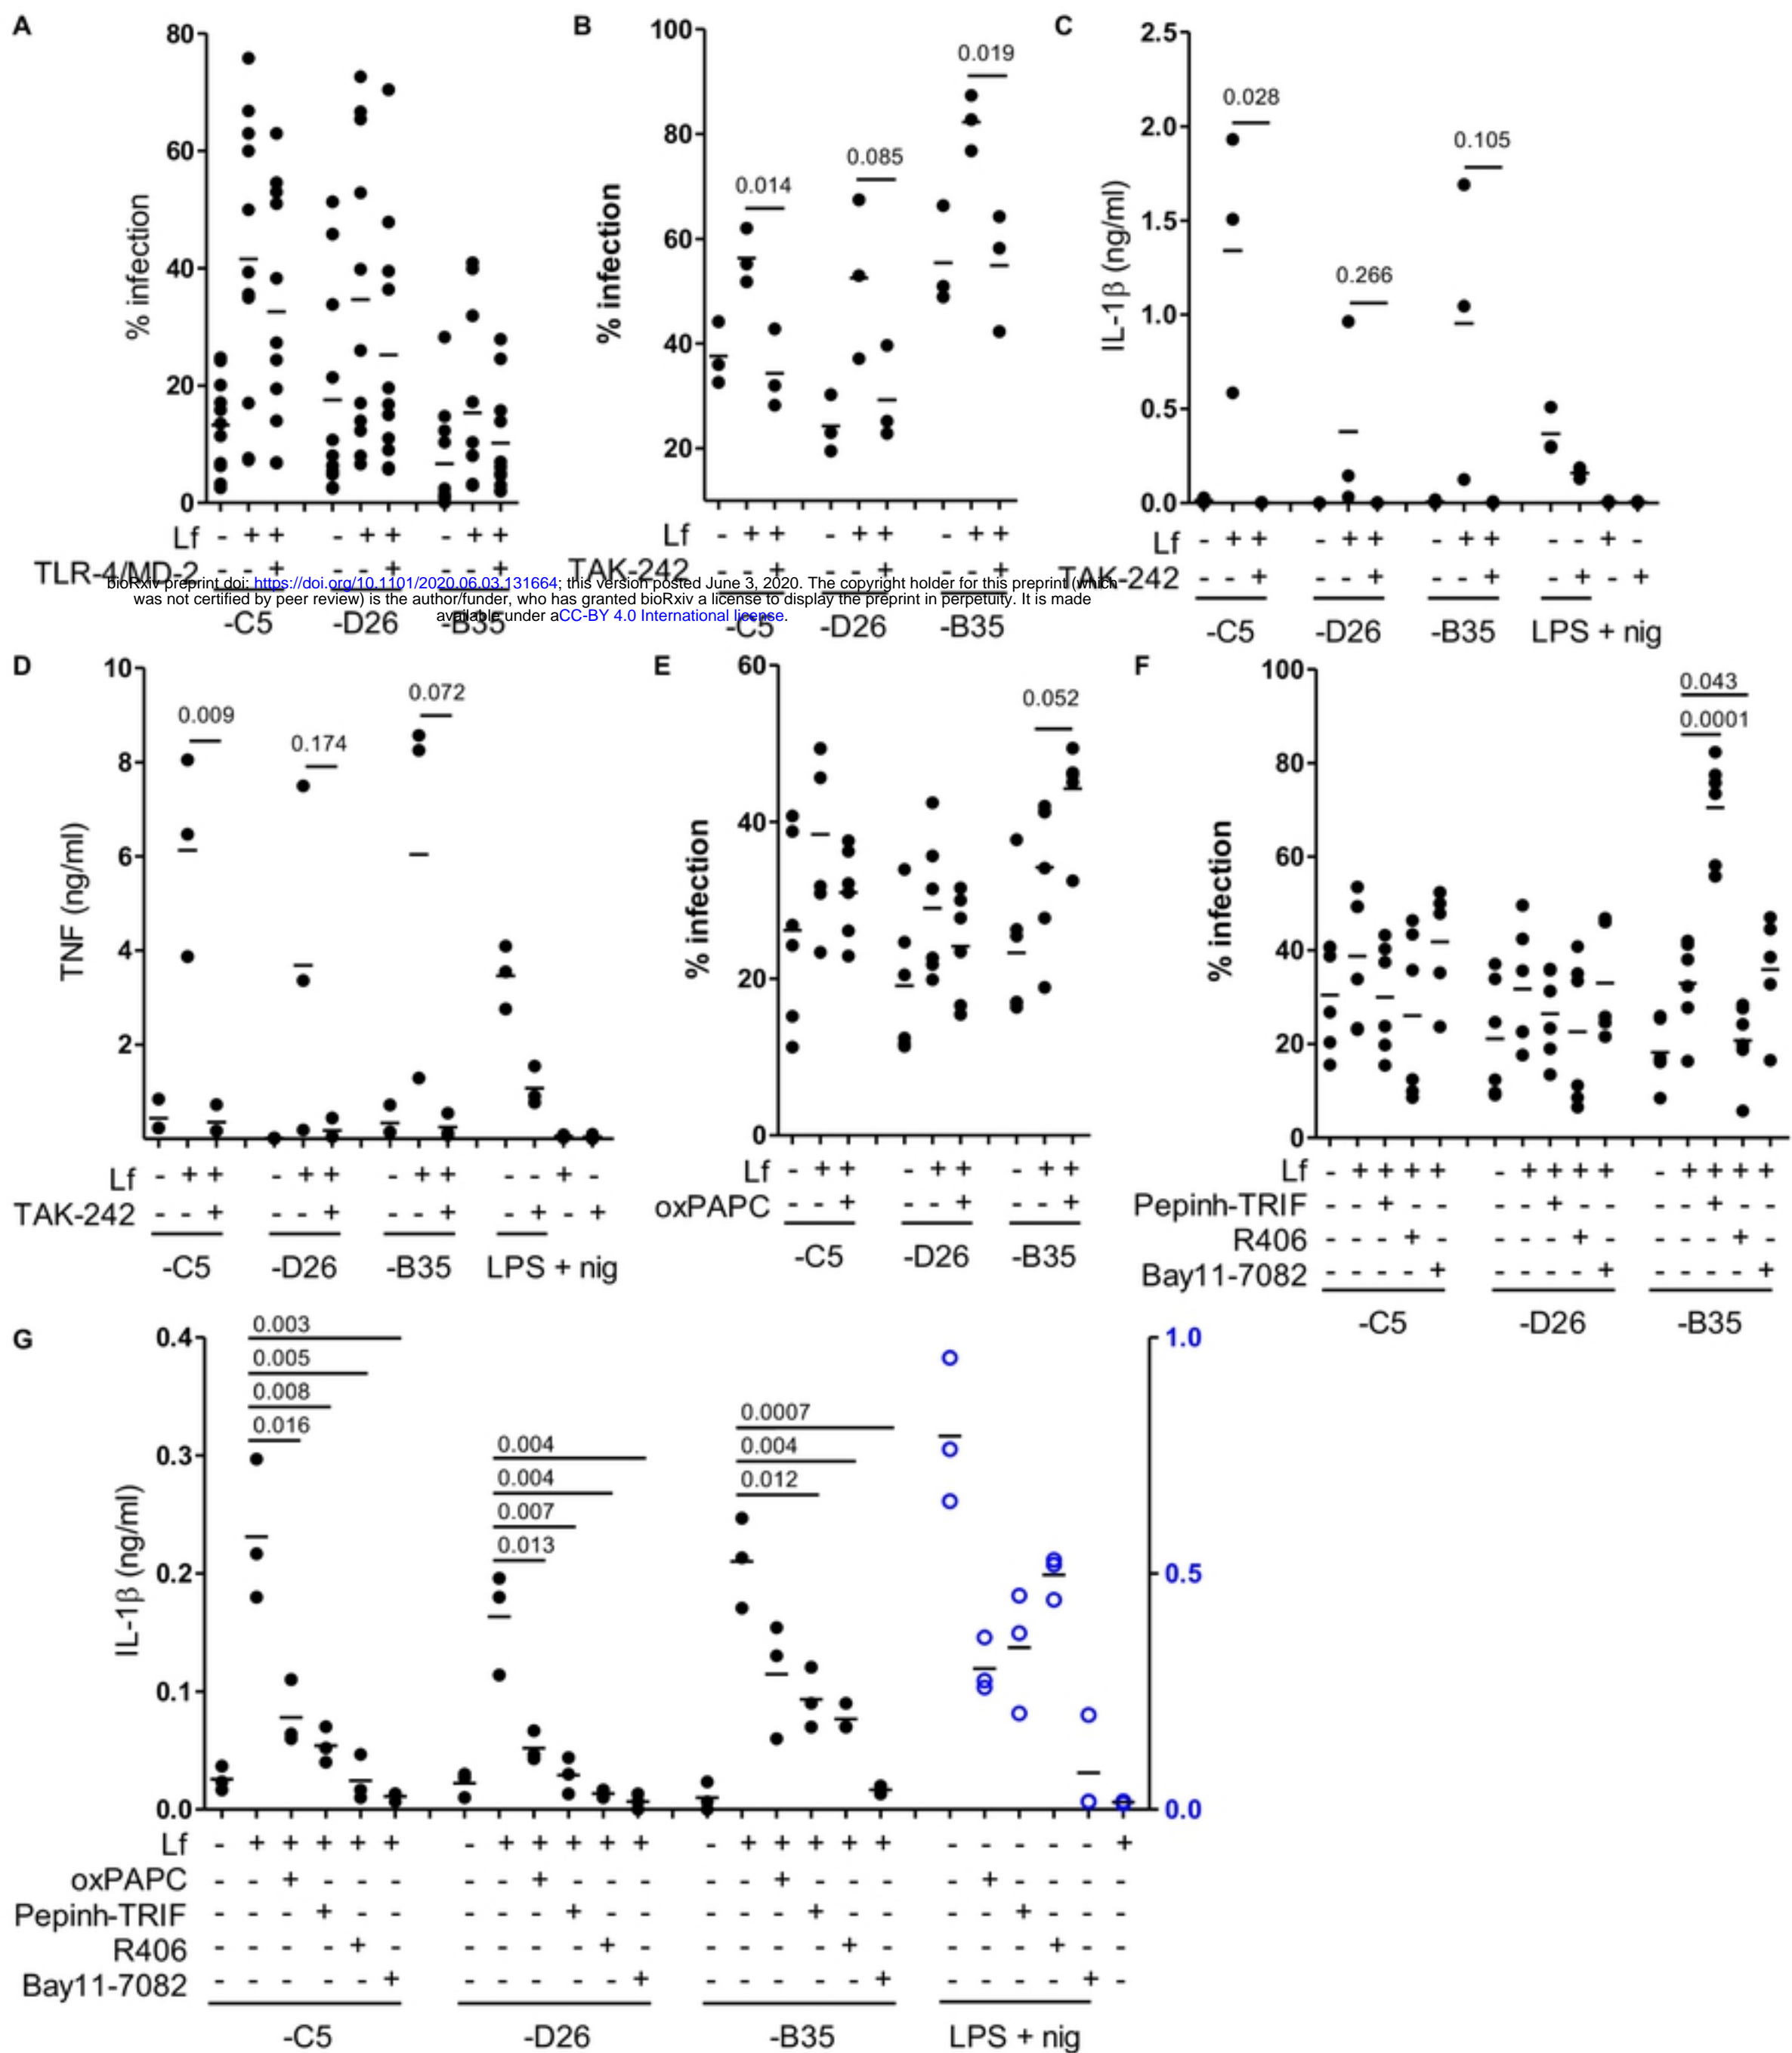

Fig 3

FIGURE 4

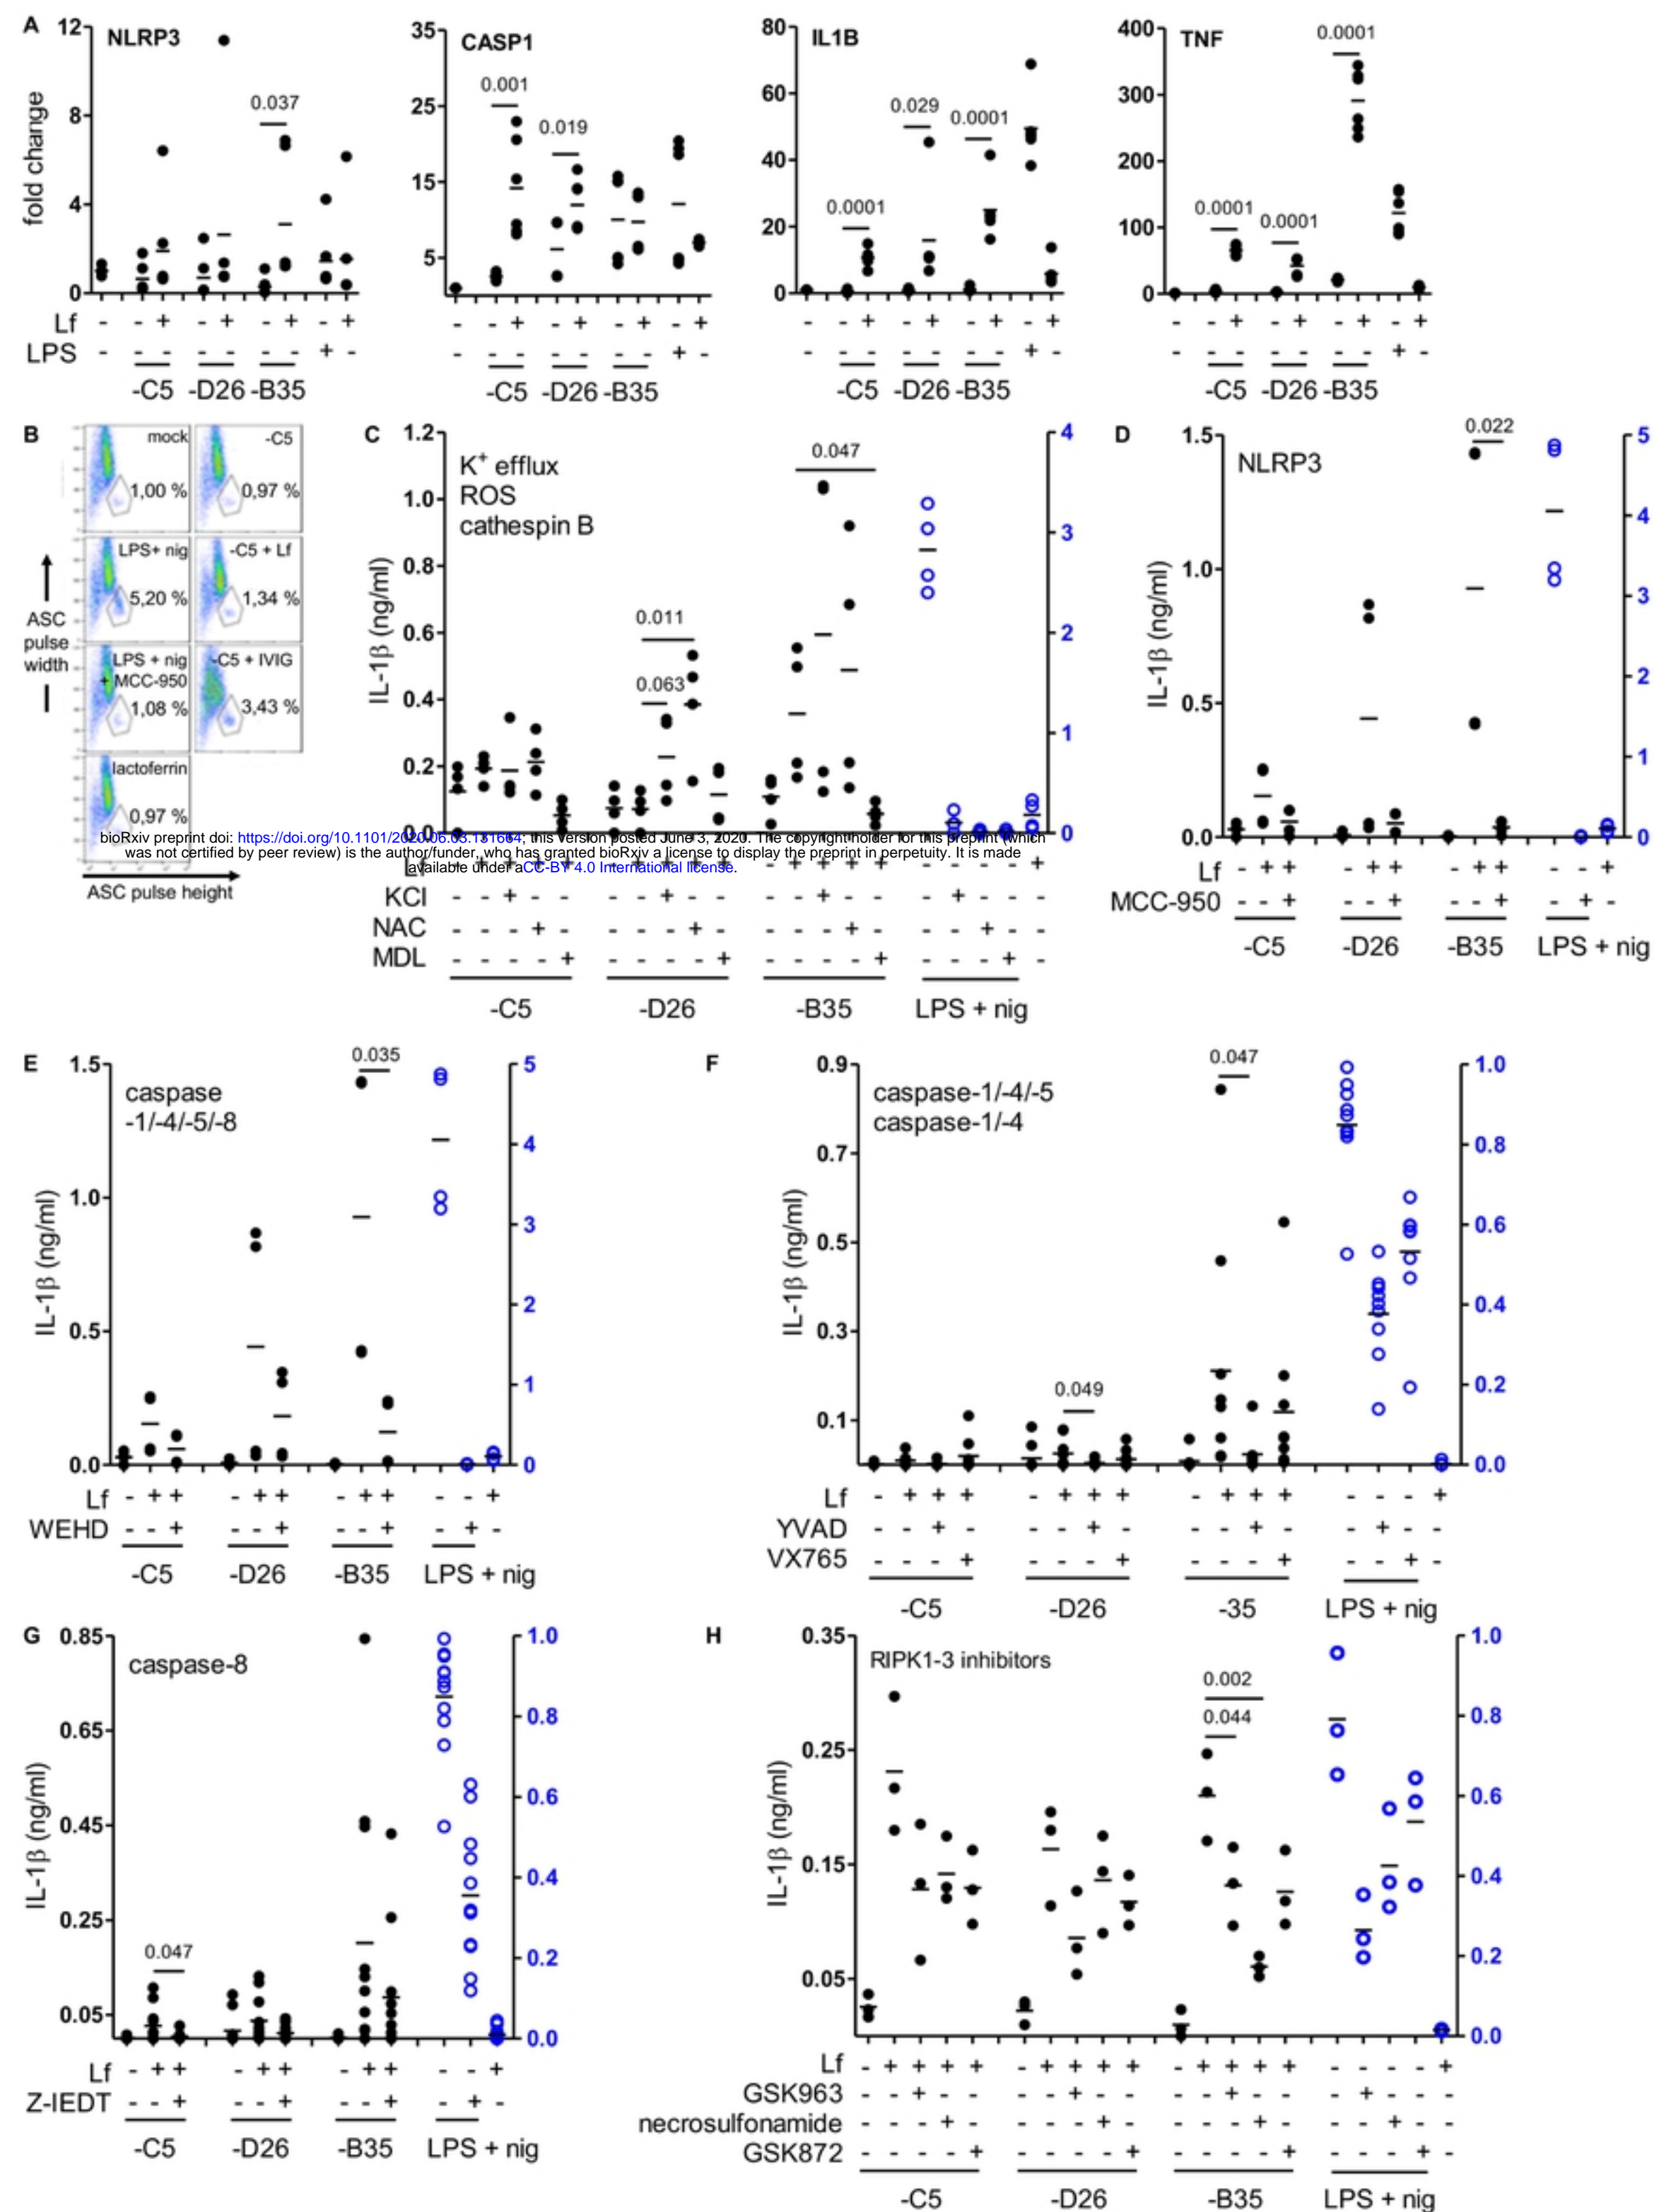

Fig 4

**FIGURE S1**

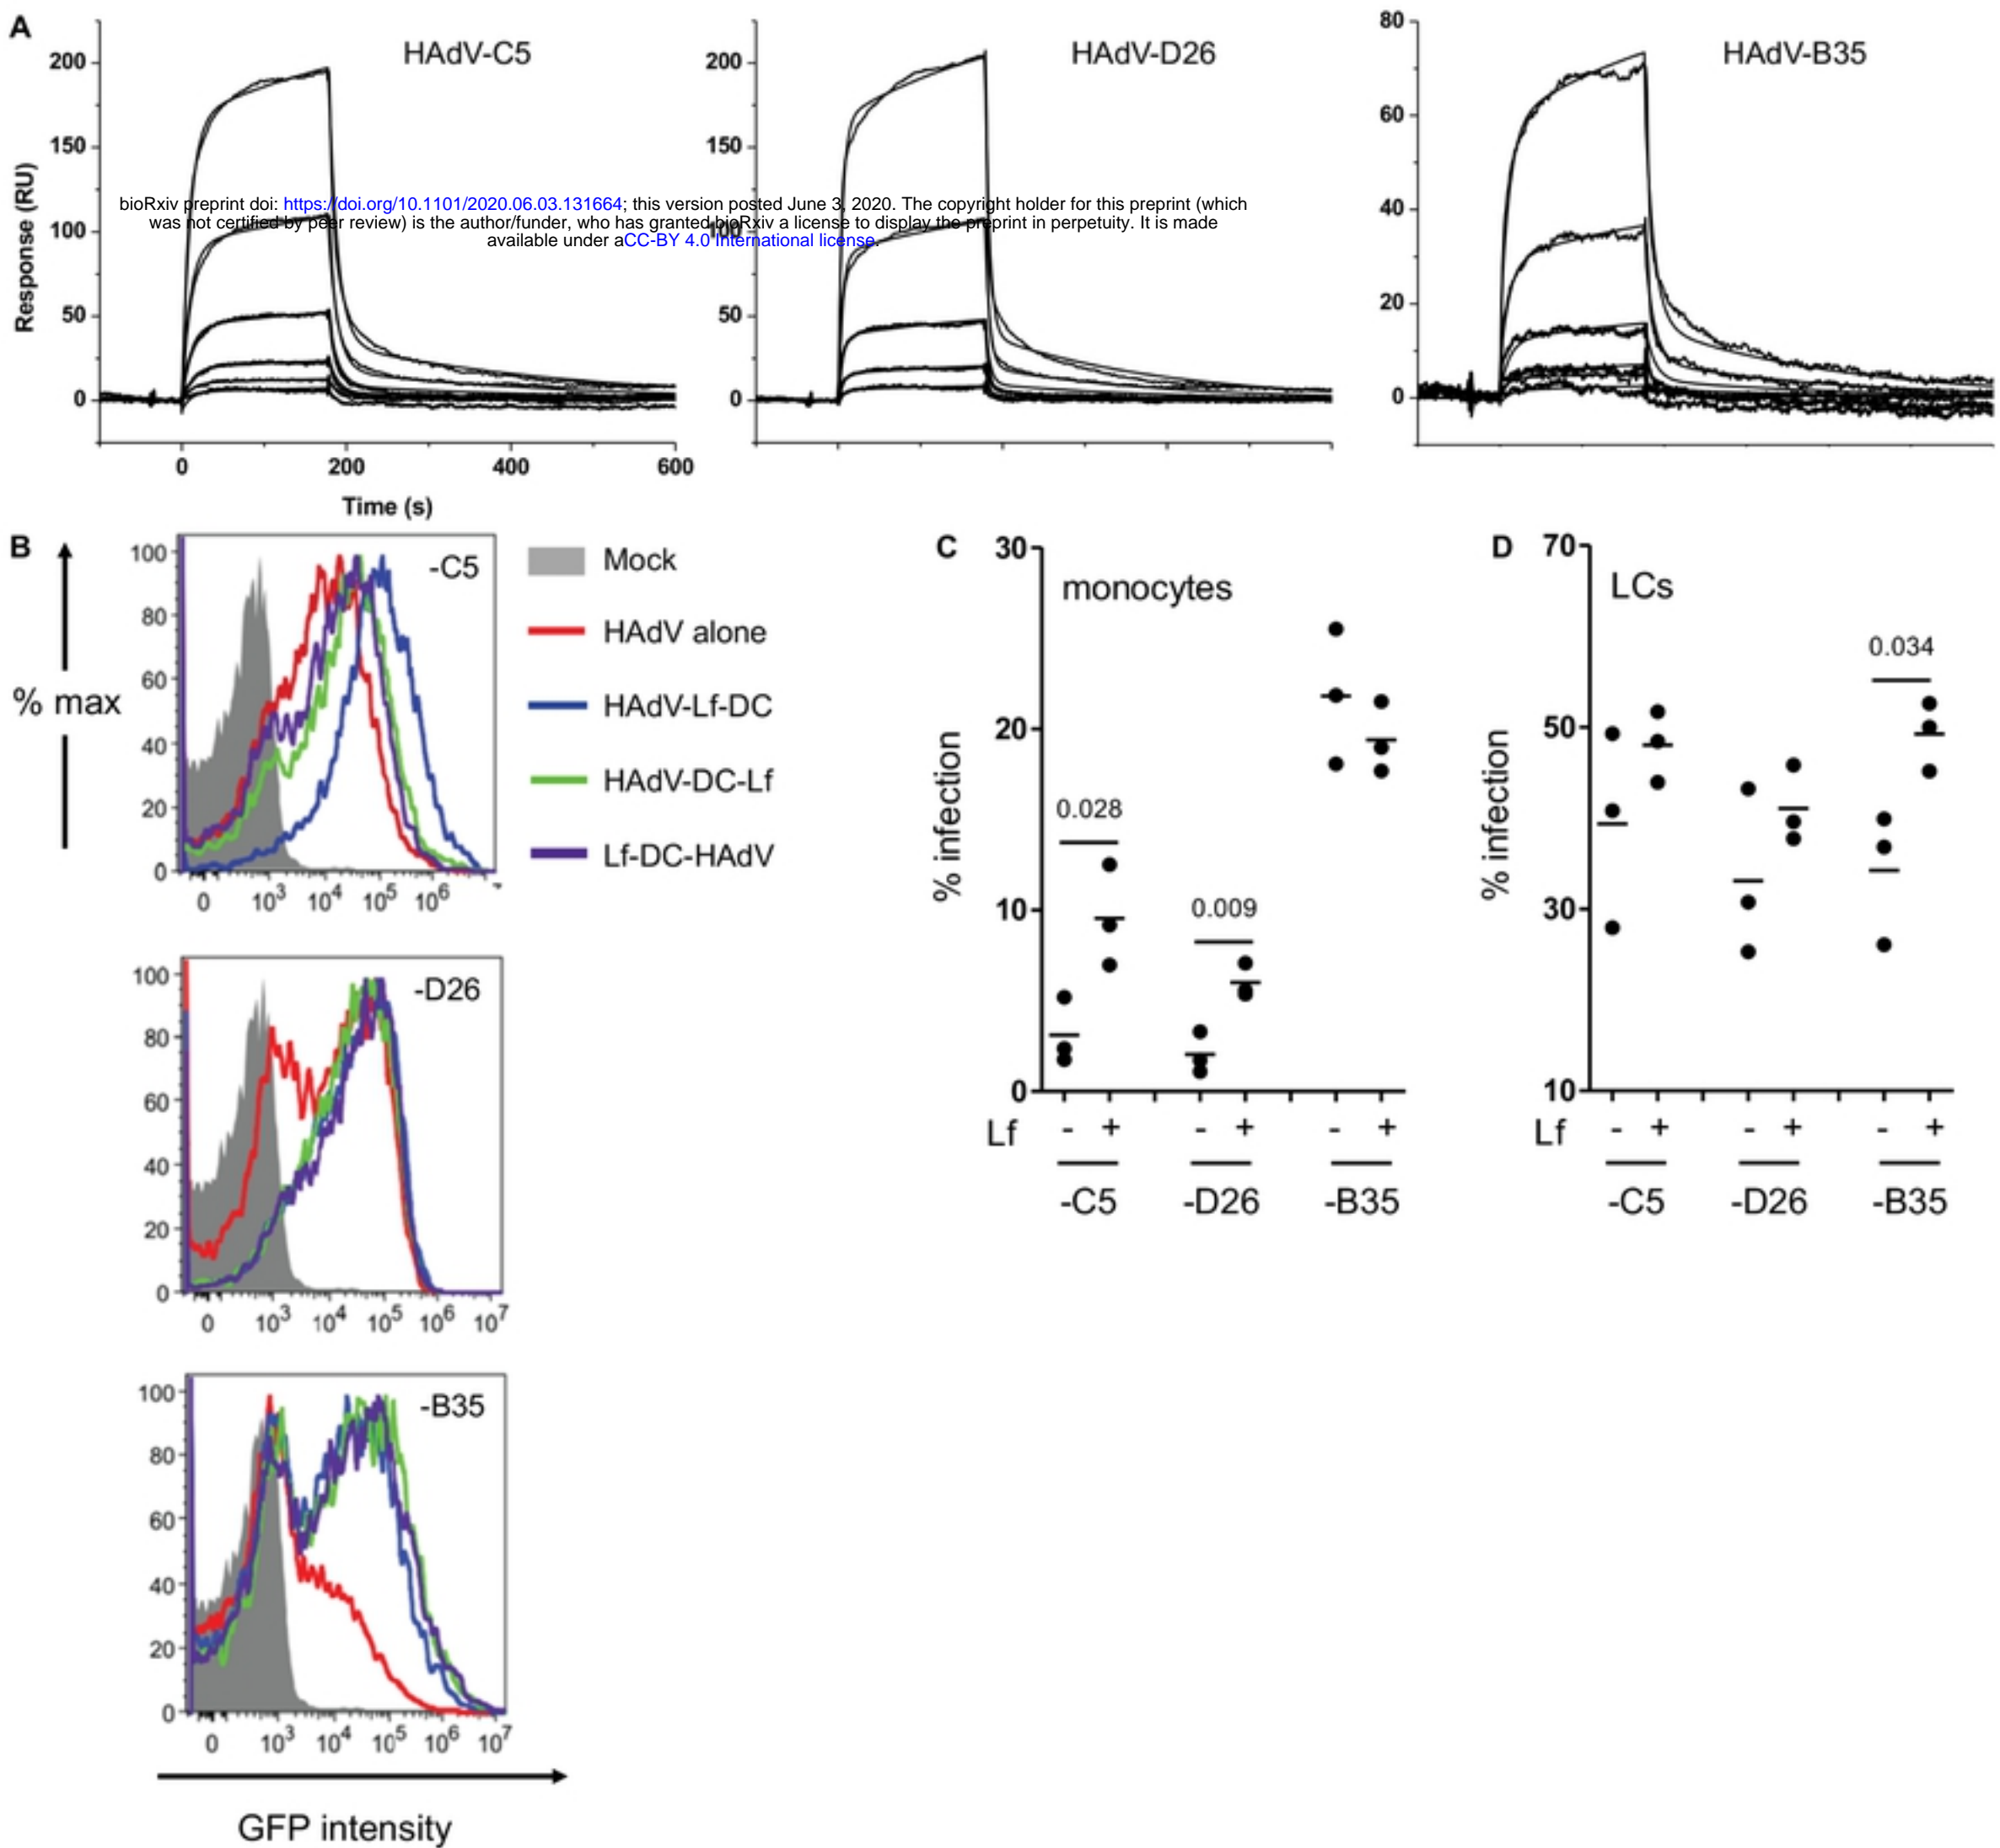

**Fig S1**

**FIGURE S2**

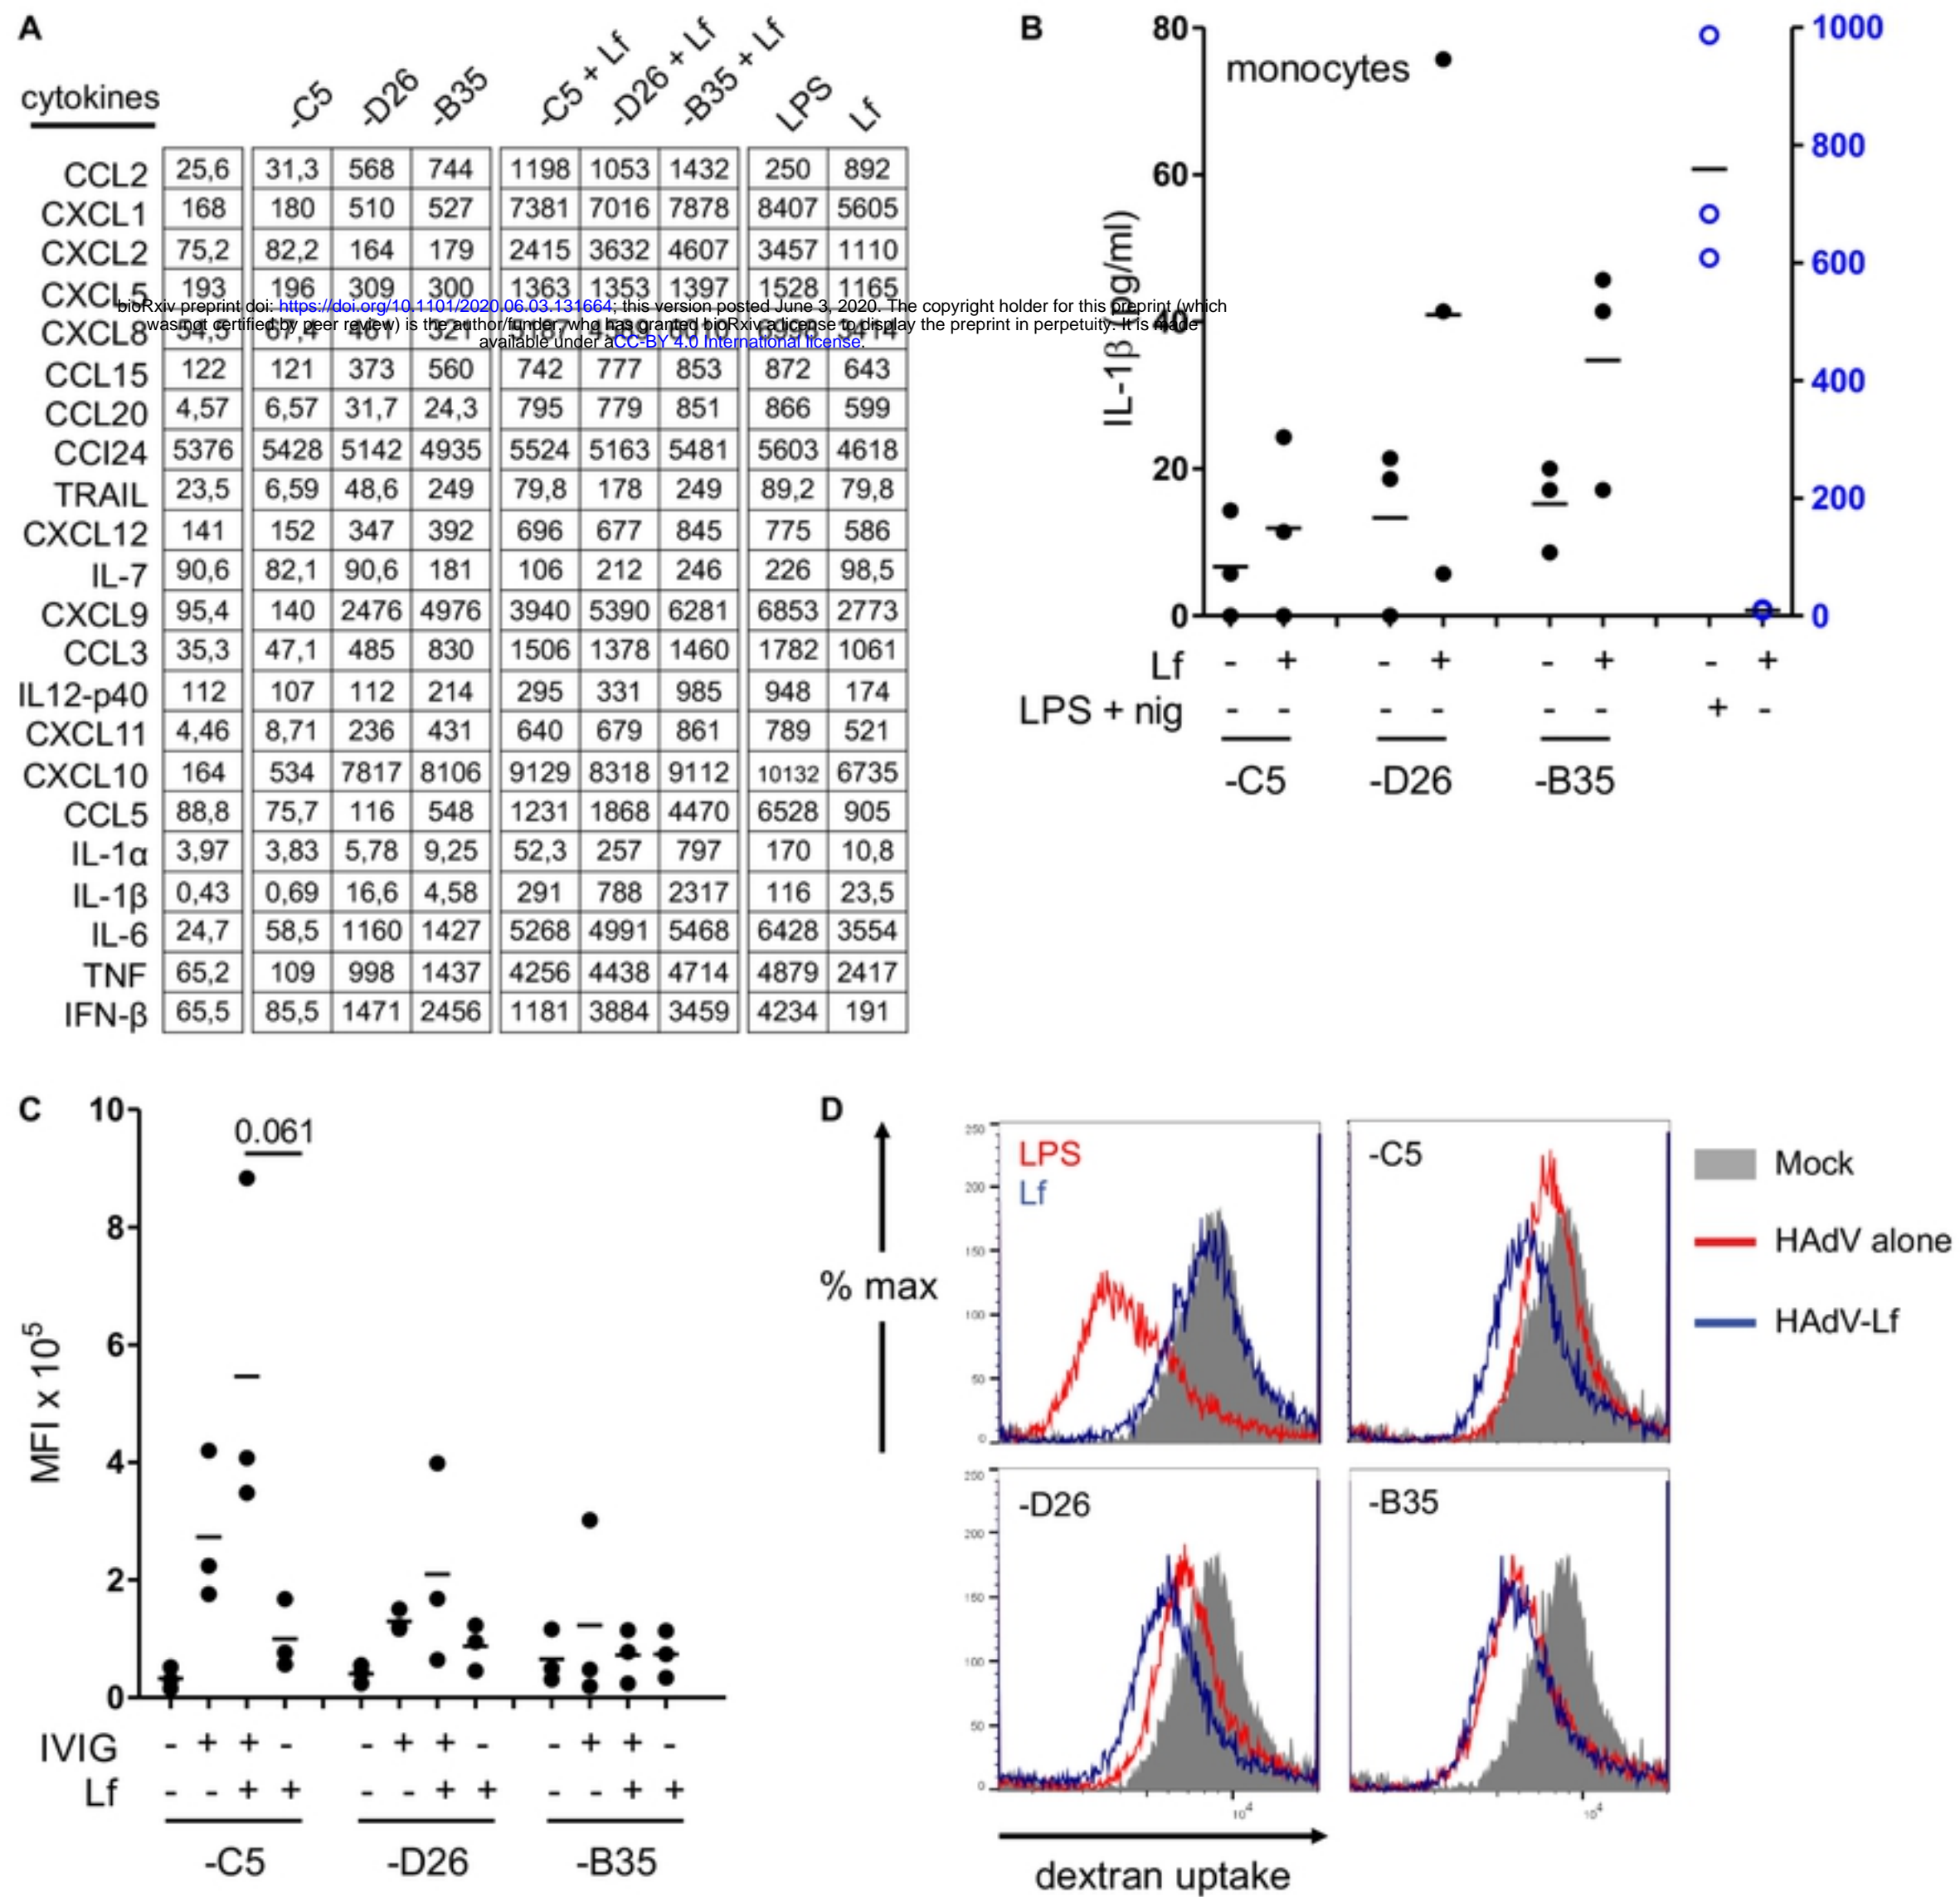

**Fig S2**

FIGURE S3

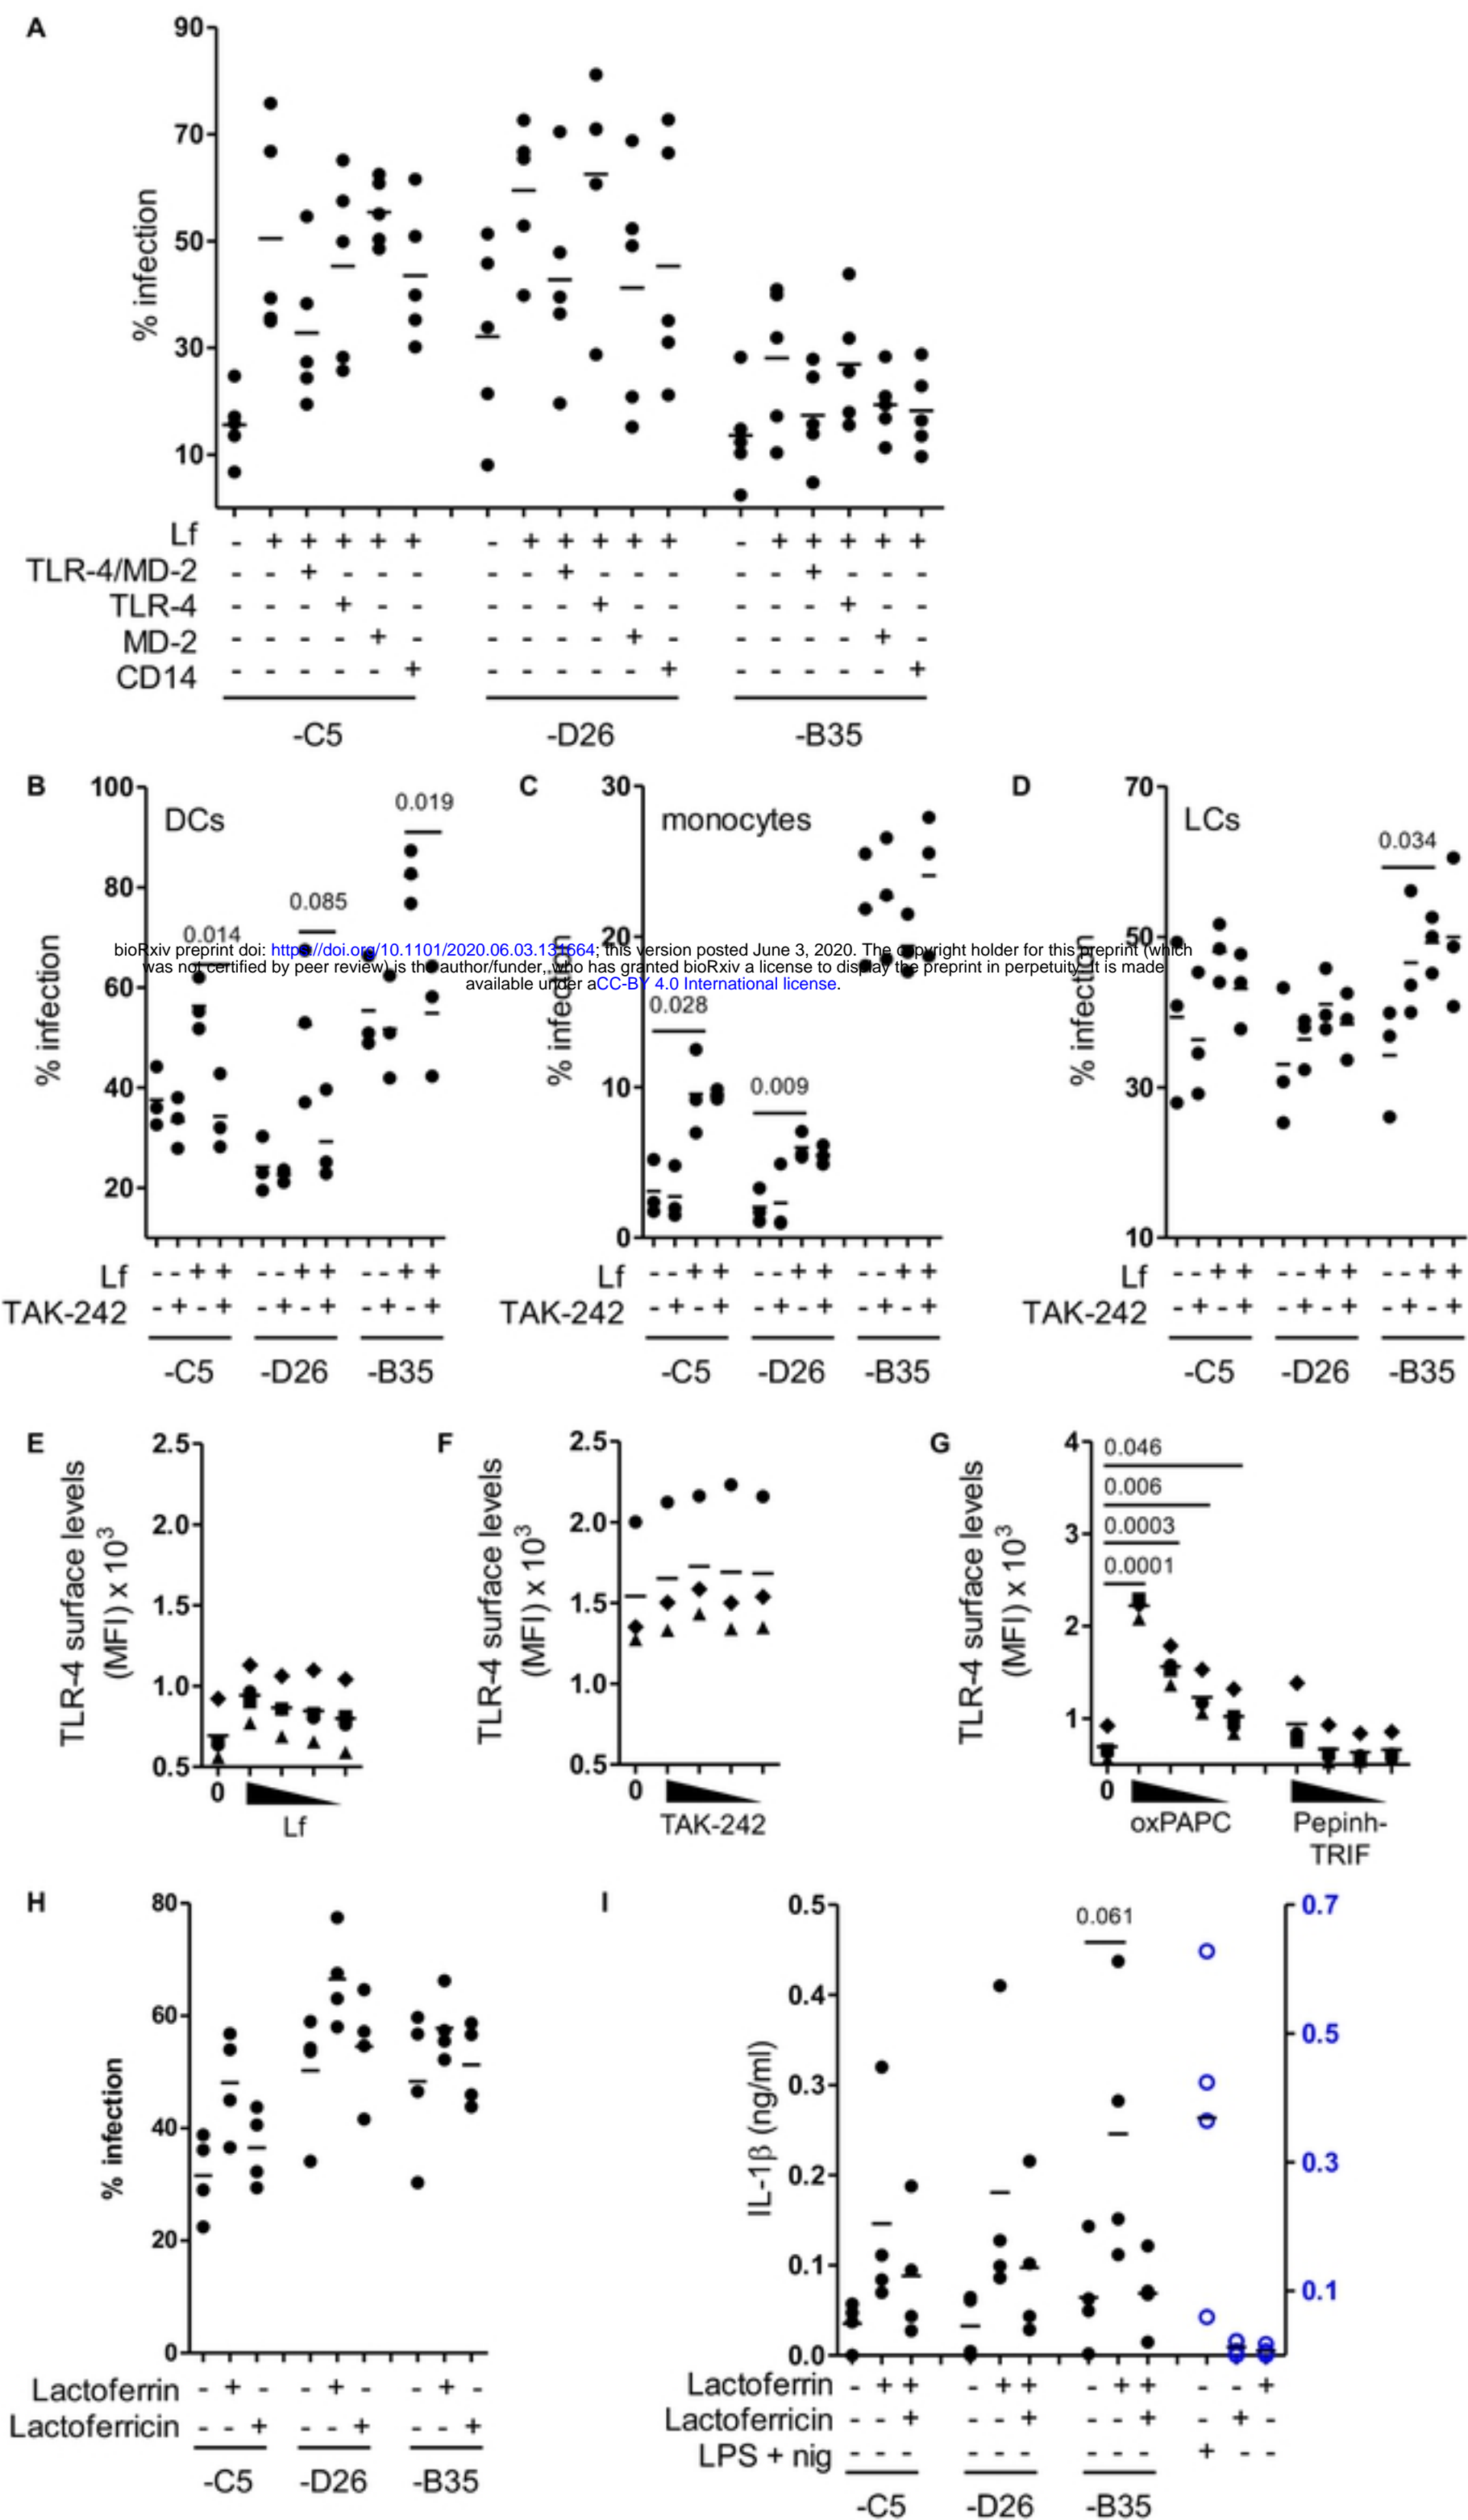

Fig S3



FIGURE S4

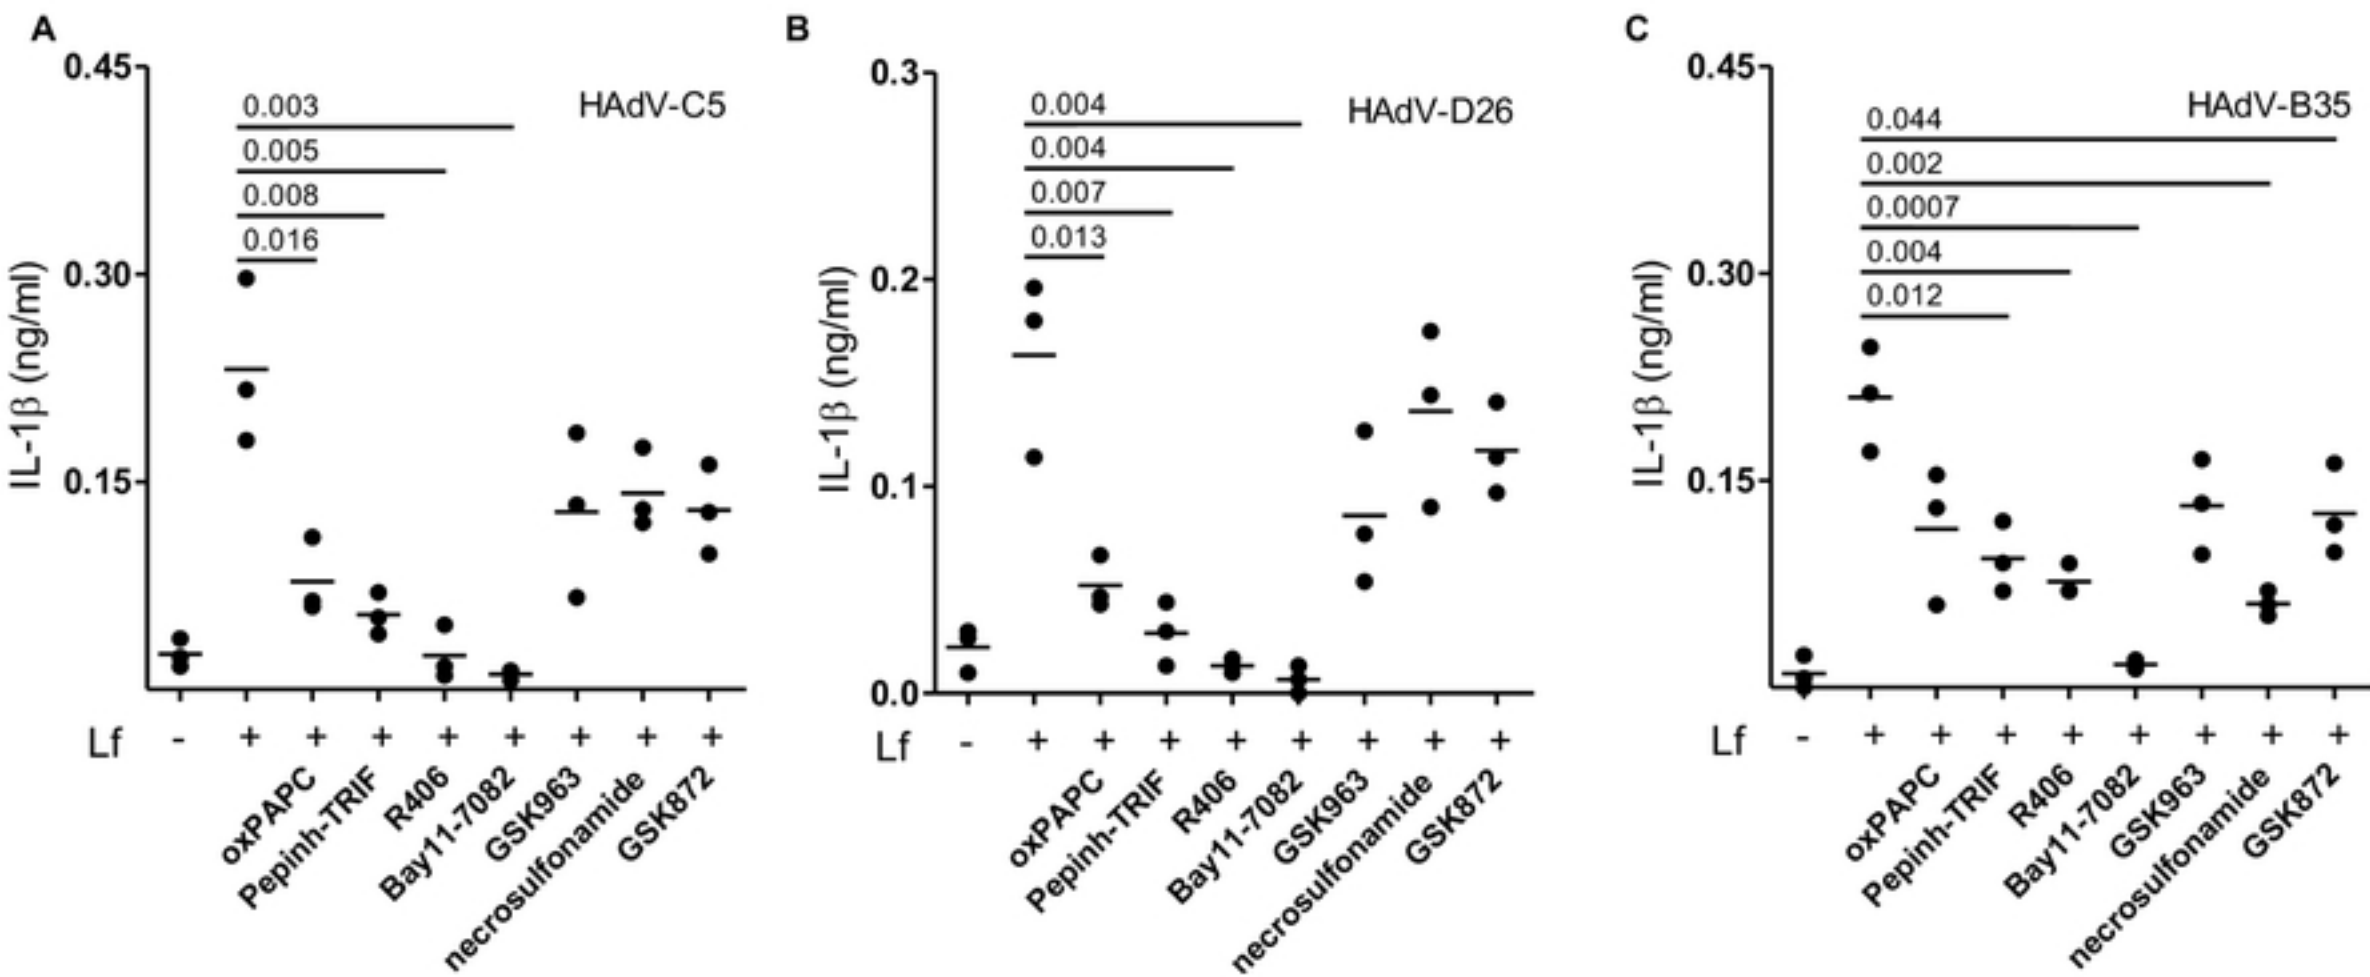

Fig S4

FIGURE 5

A

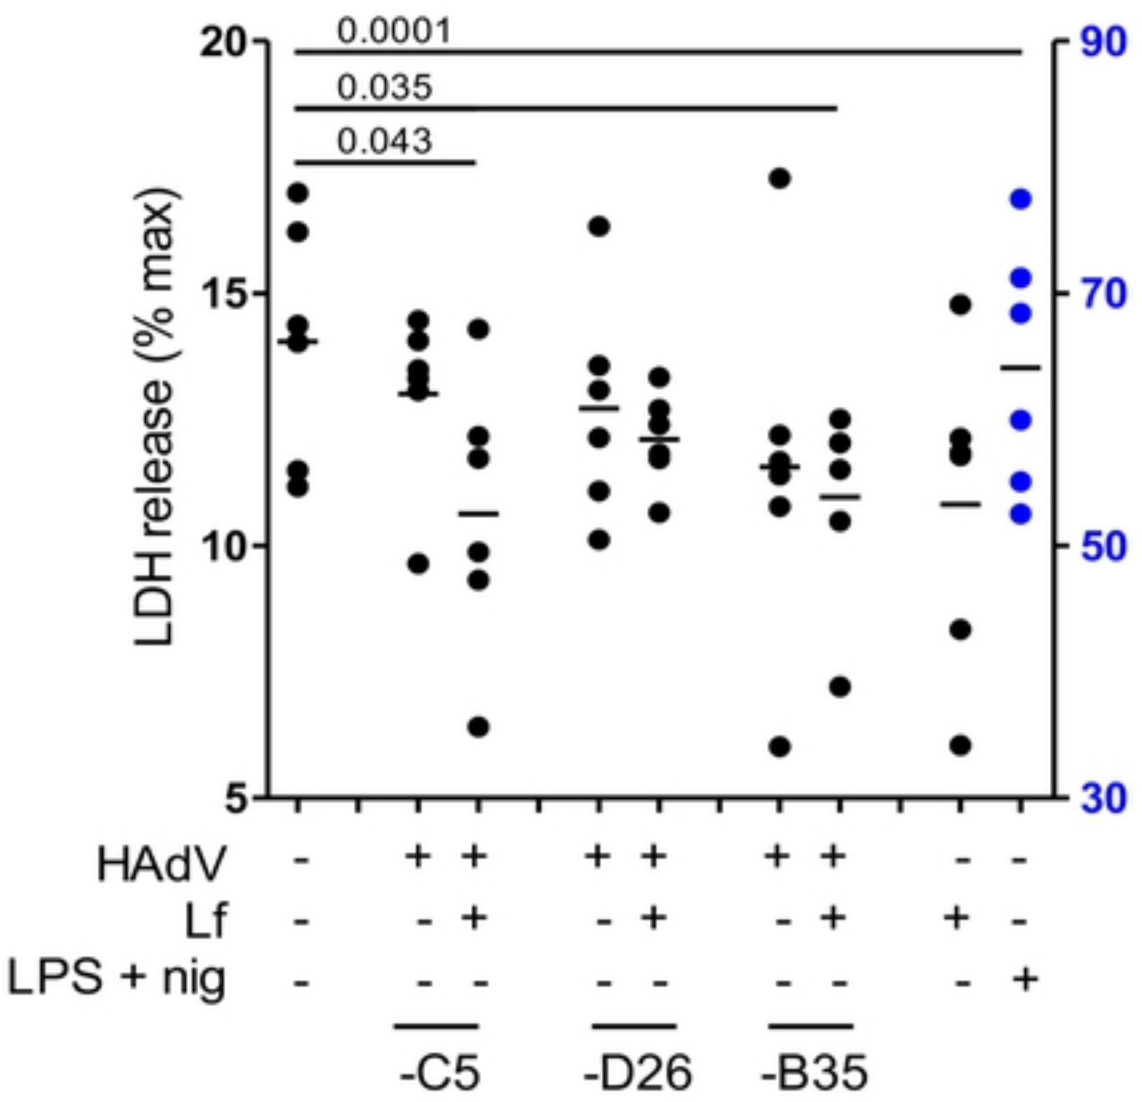

B

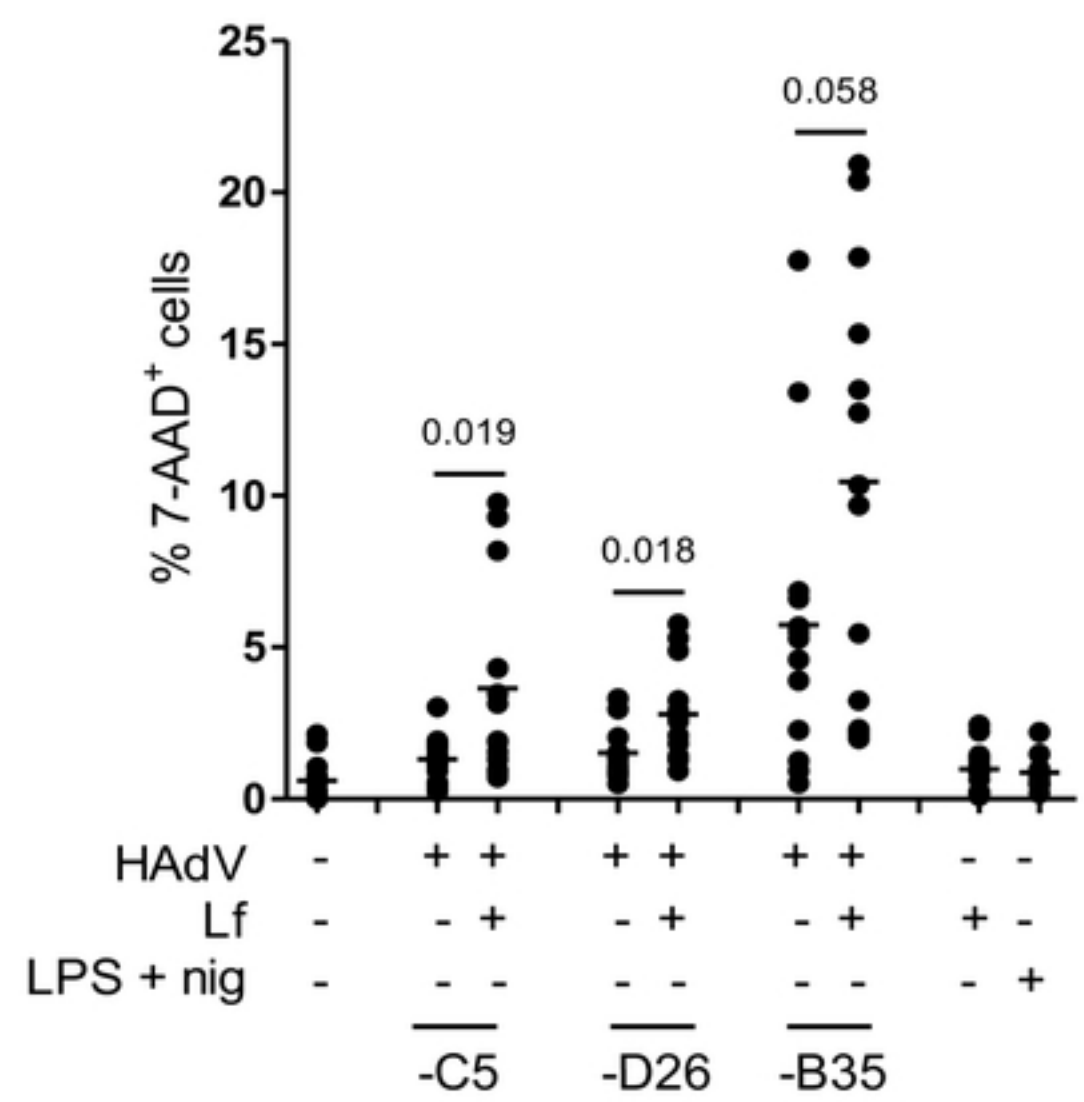

Fig 5

# FIGURE S5

bioRxiv preprint doi: <https://doi.org/10.1101/2020.06.03.131664>; this version posted June 3, 2020. The copyright holder for this preprint (which was not certified by peer review) is the author/funder, who has granted bioRxiv a license to display the preprint in perpetuity. It is made available under aCC-BY 4.0 International license.

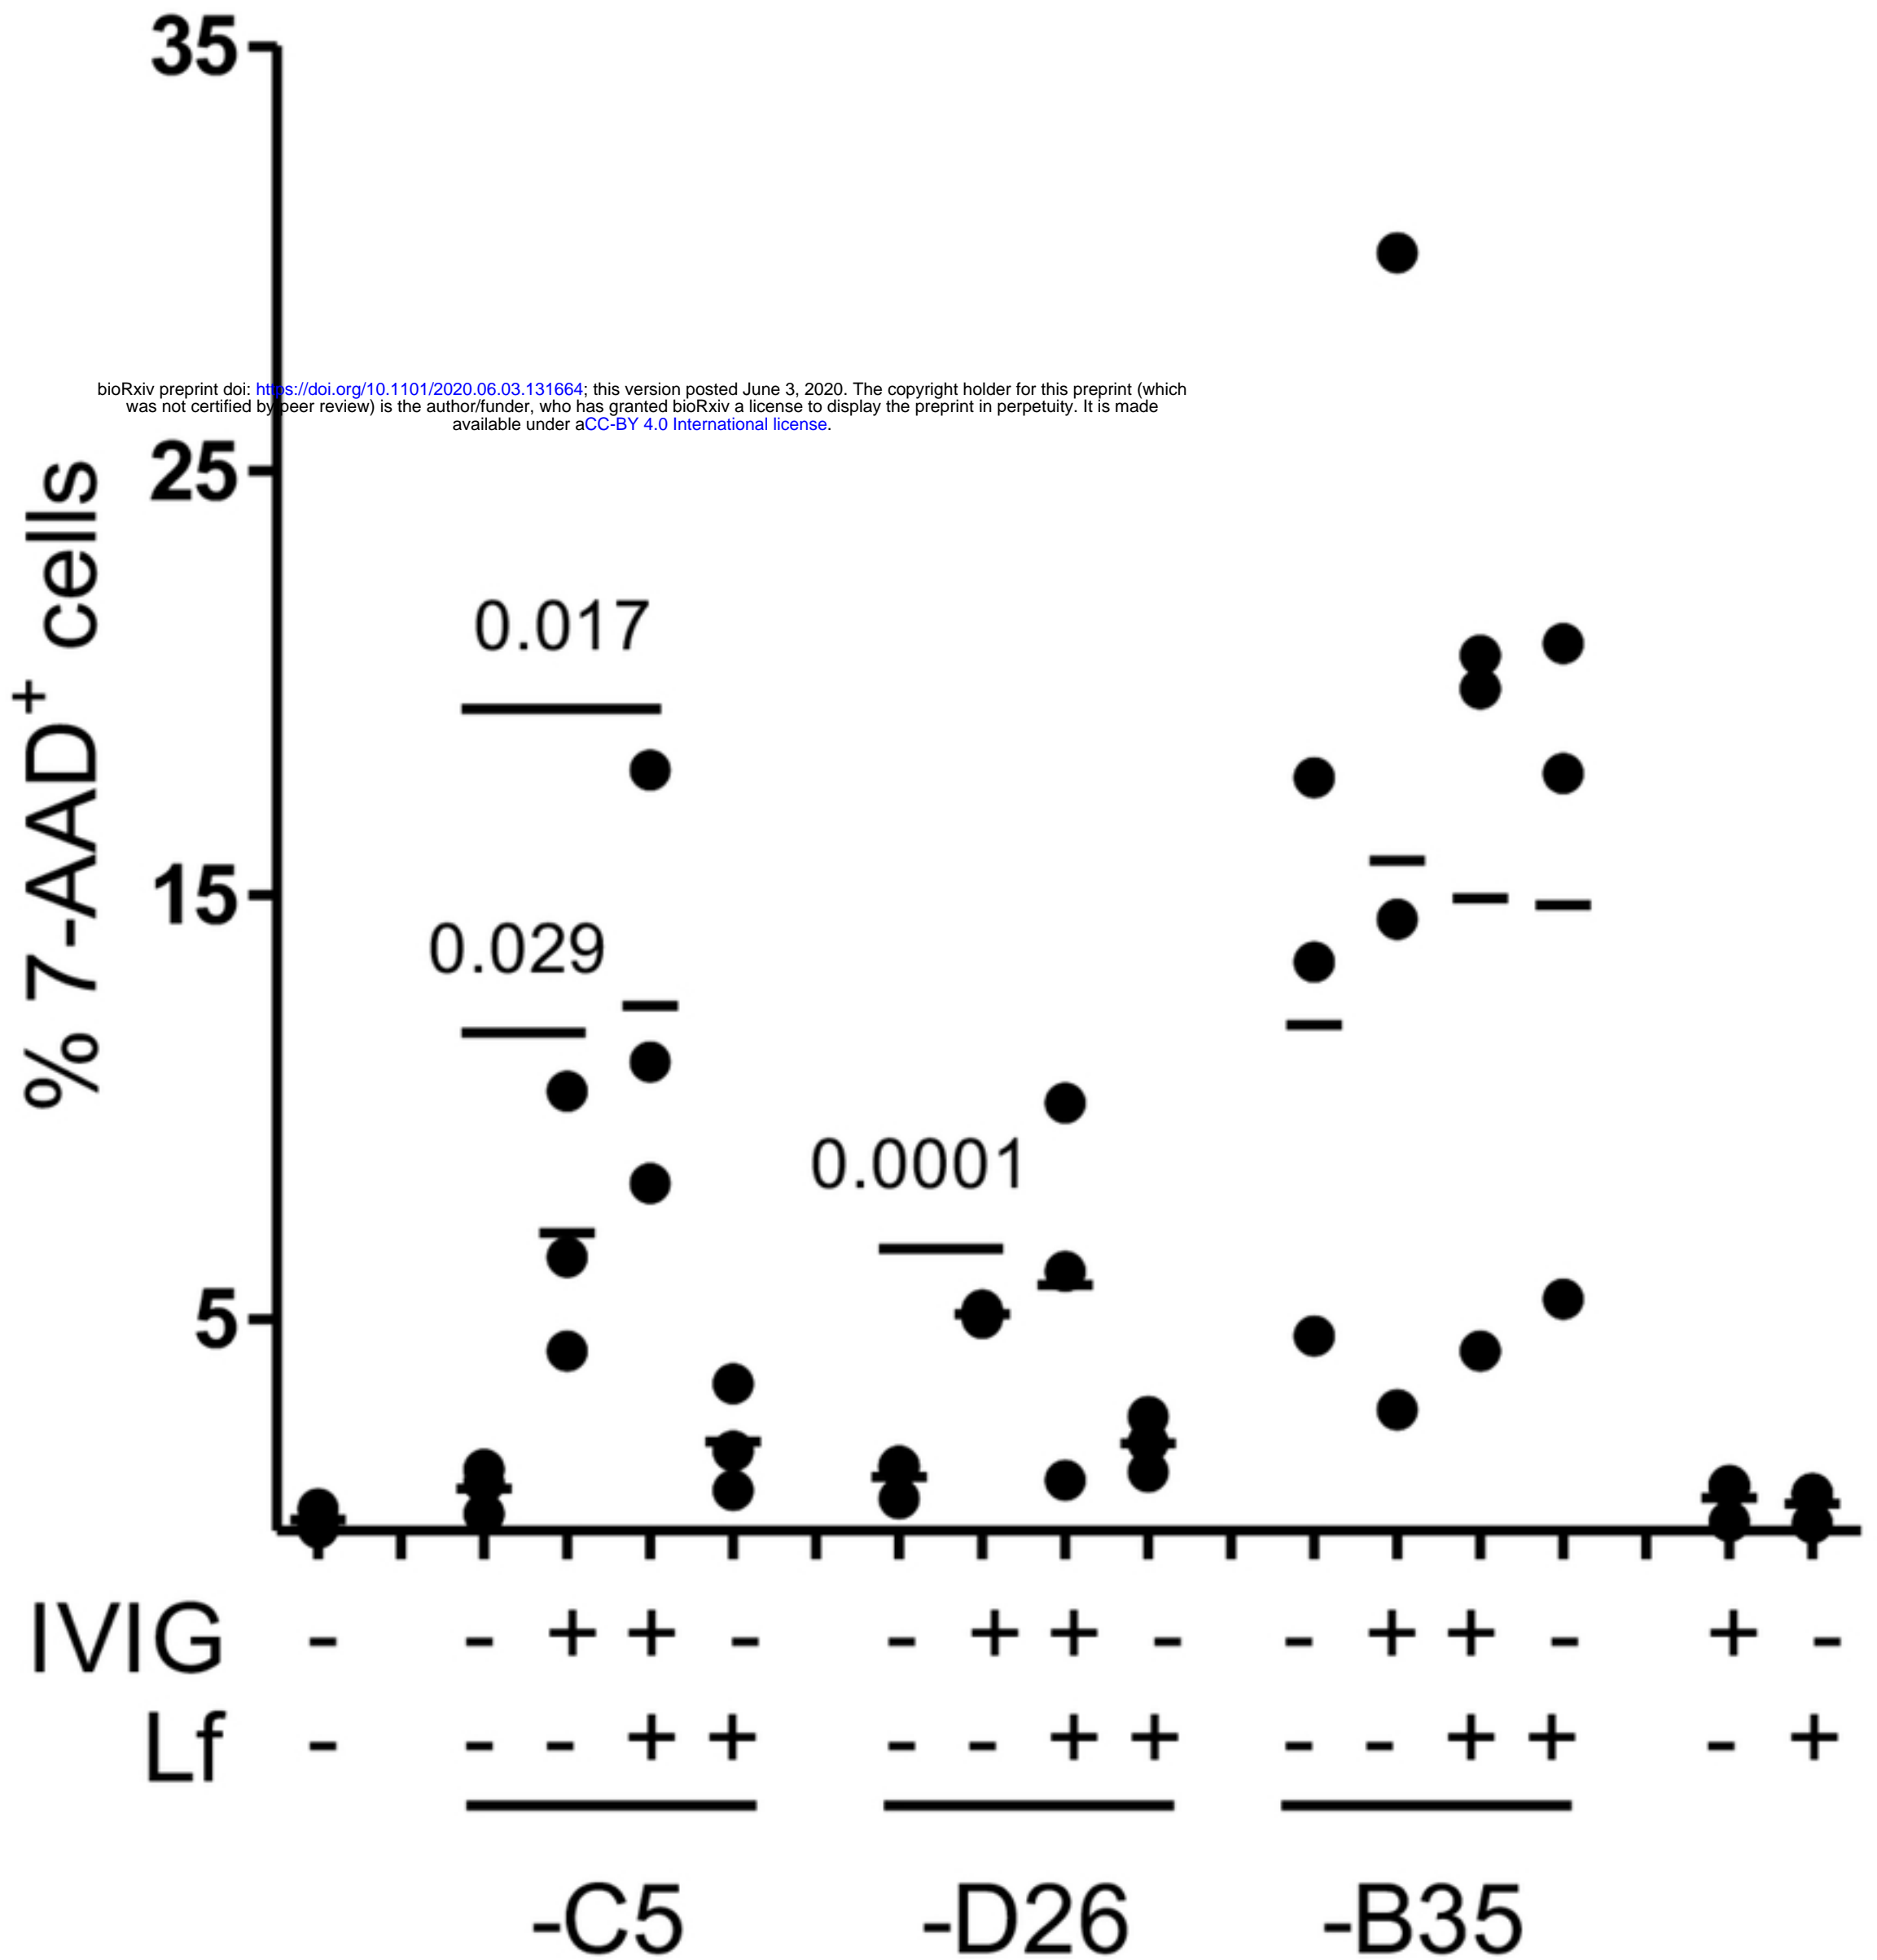

Fig S5

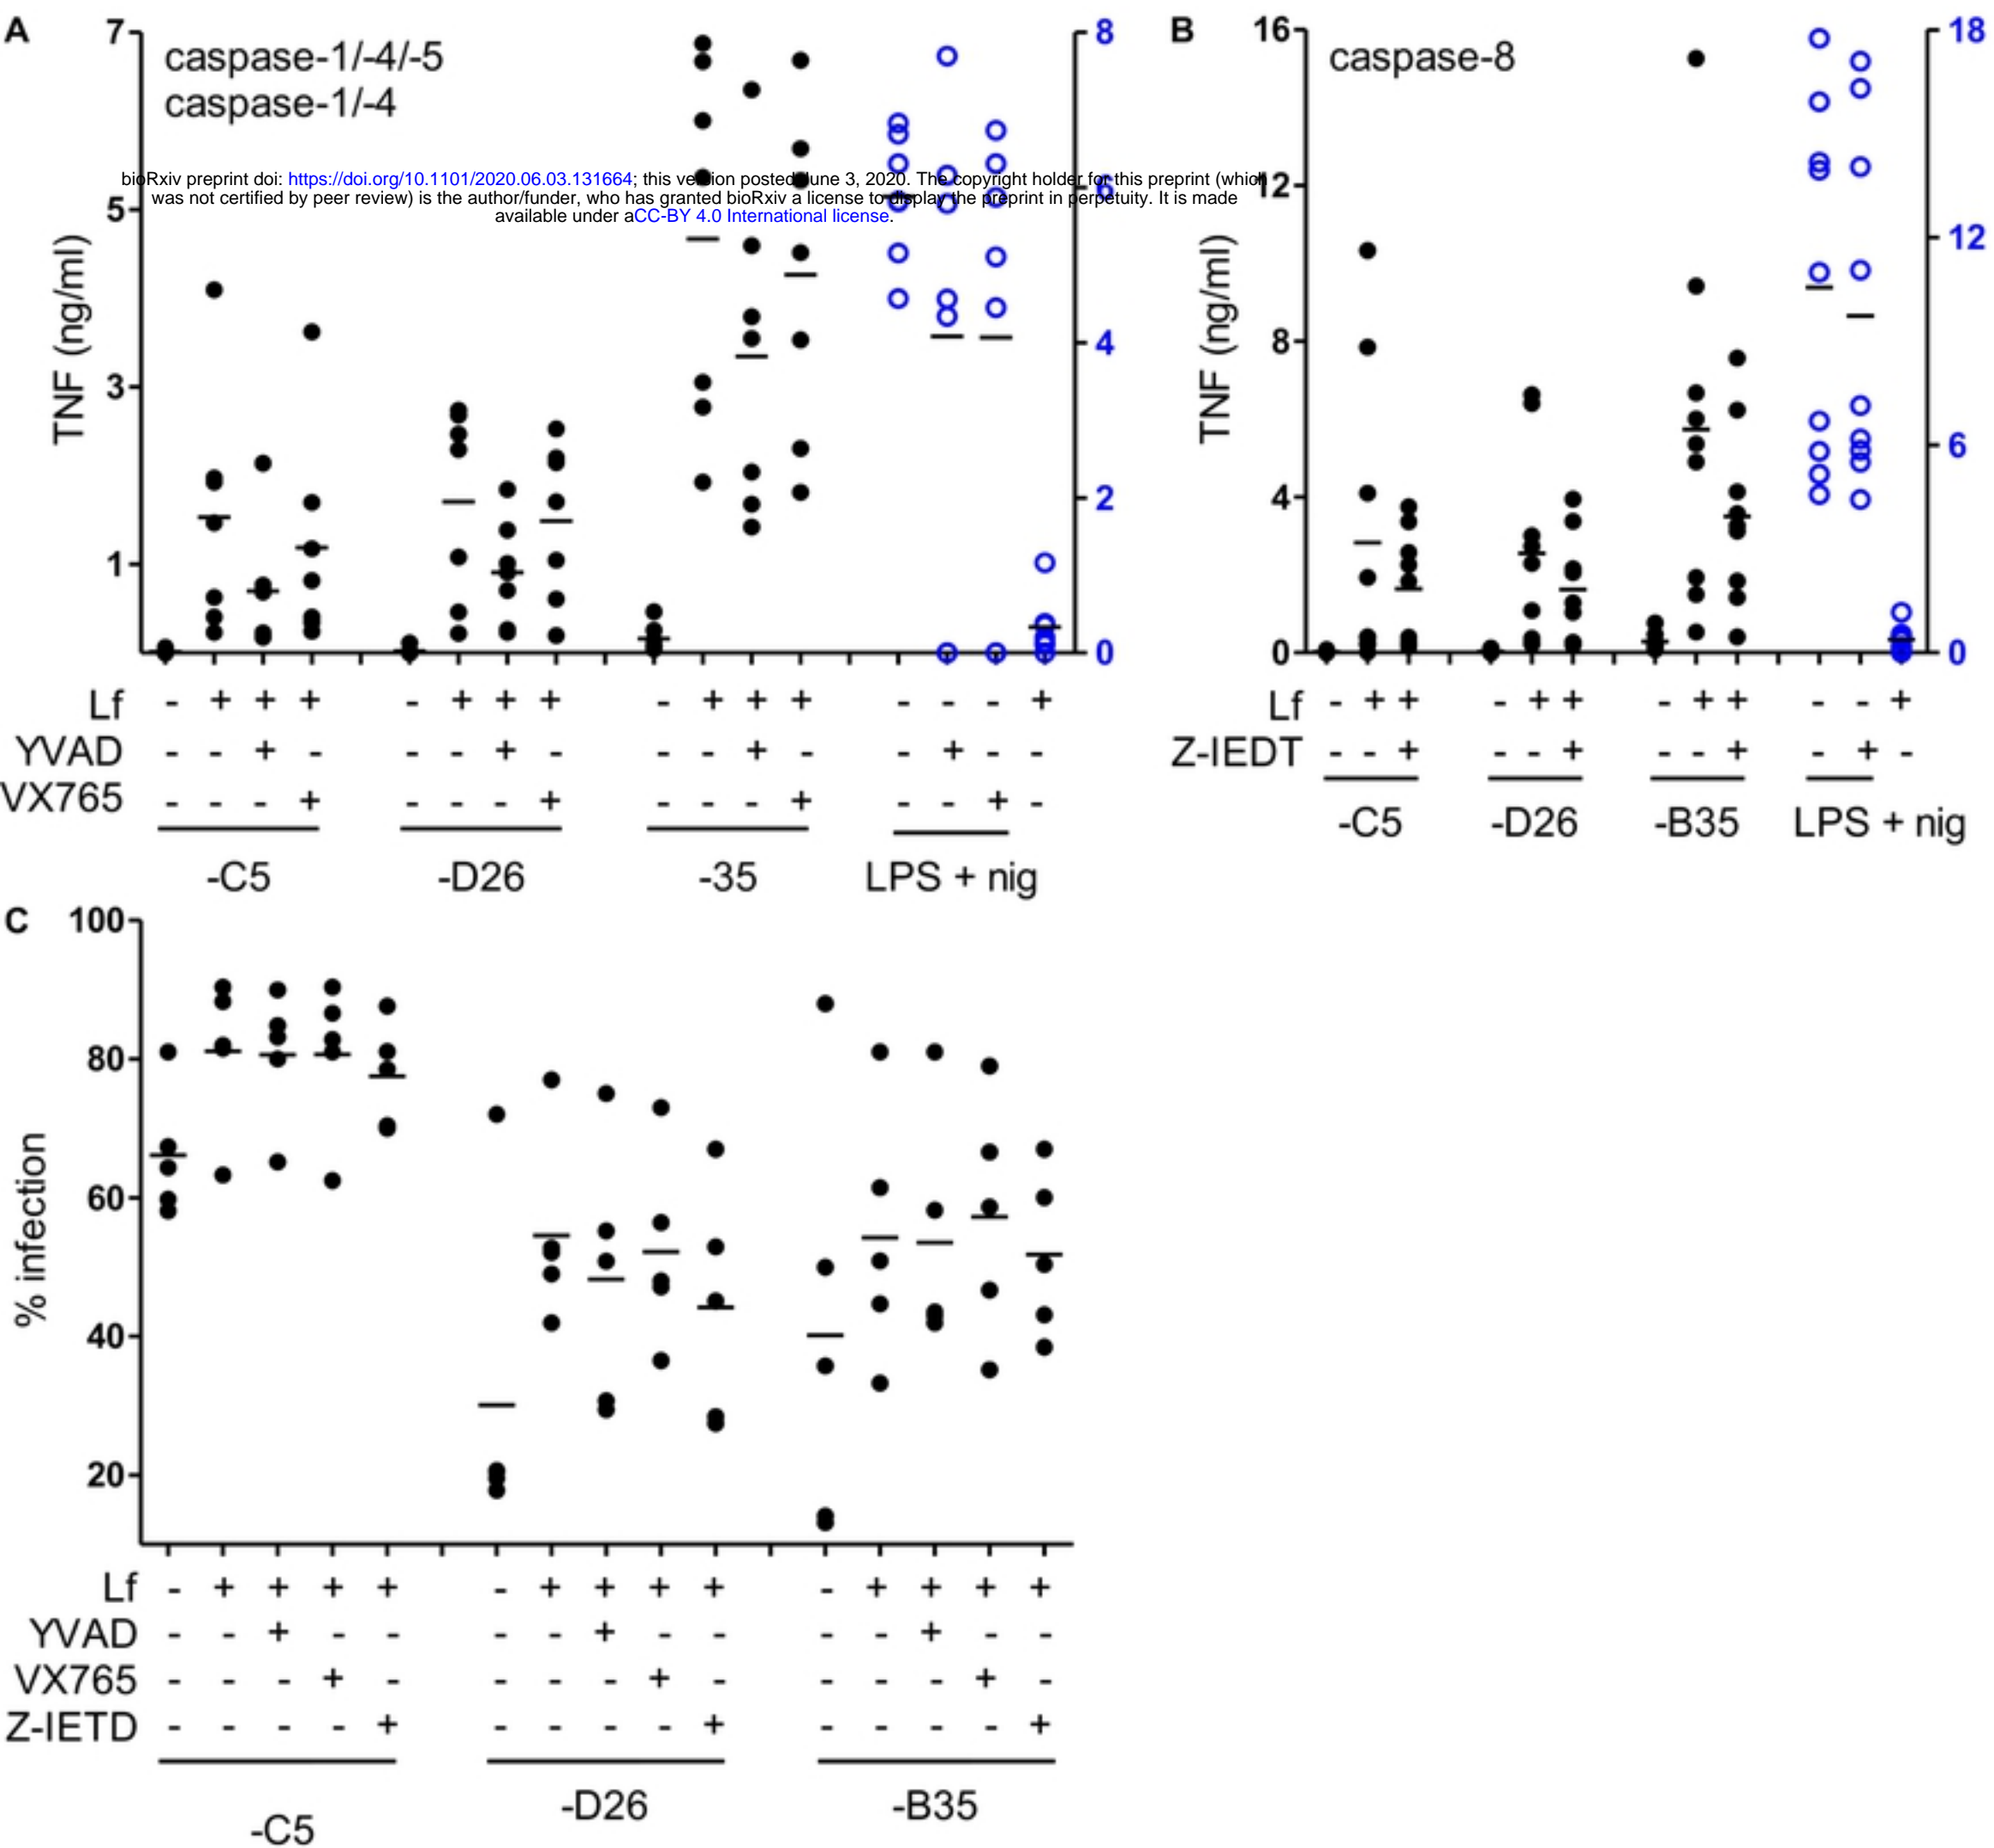

Fig S6

FIGURE 6

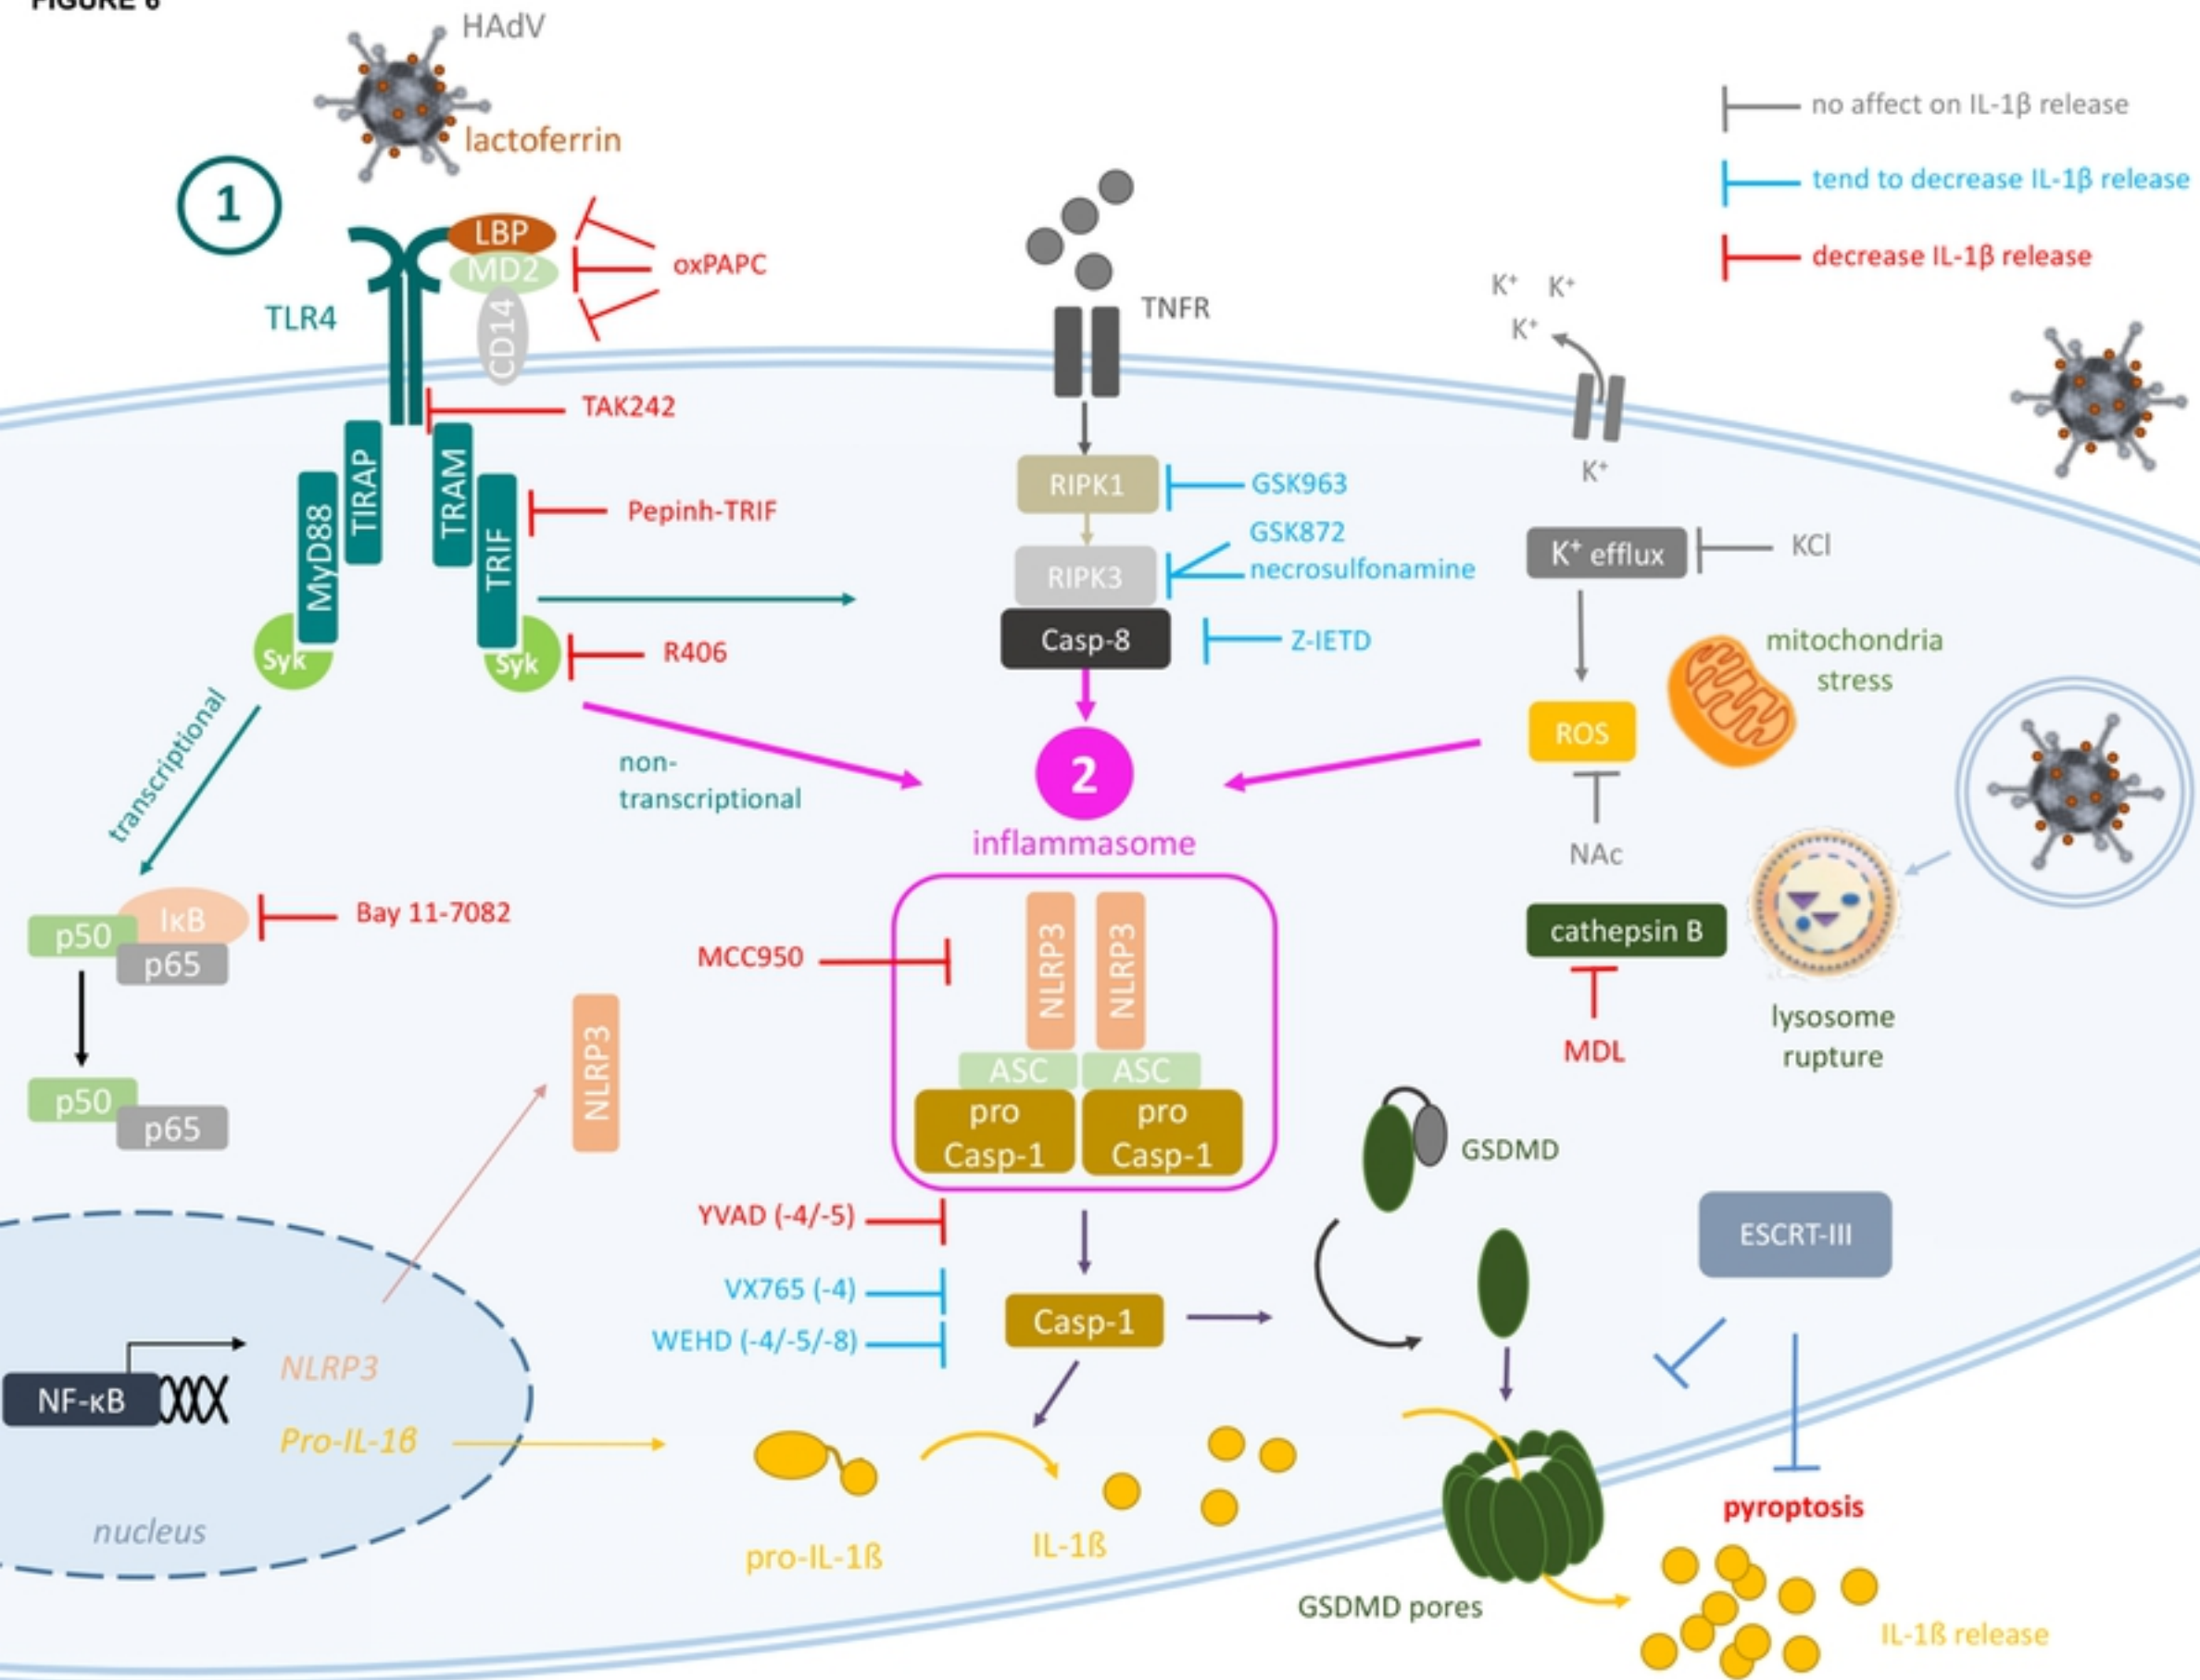

Fig 6
